# Supplementary material
Source: Royal Society of Chemistry journal article supplement (doi:10.1039/d6ob00591h)

Supporting Information for Review

## **Synthesis of Substituted N-Heterocycles via Cascade, Michael Addition, Double Cyclization and Air Oxidation Reaction**

Hunmoina Phukon, Bikoshita Porashar, Ankita Pradhan and Anil K. Saikia\*

Department of Chemistry, Indian Institute of Technology Guwahati, Guwahati-781039,  
Assam, India

e-mail: [asaikia@iitg.ac.in](mailto:asaikia@iitg.ac.in)

### **Table of Contents**

- |                                      |        |
|--------------------------------------|--------|
| 1. HRMS spectra of all new compounds | S2-S52 |
|--------------------------------------|--------|

### HRMS spectrum of compound 3a

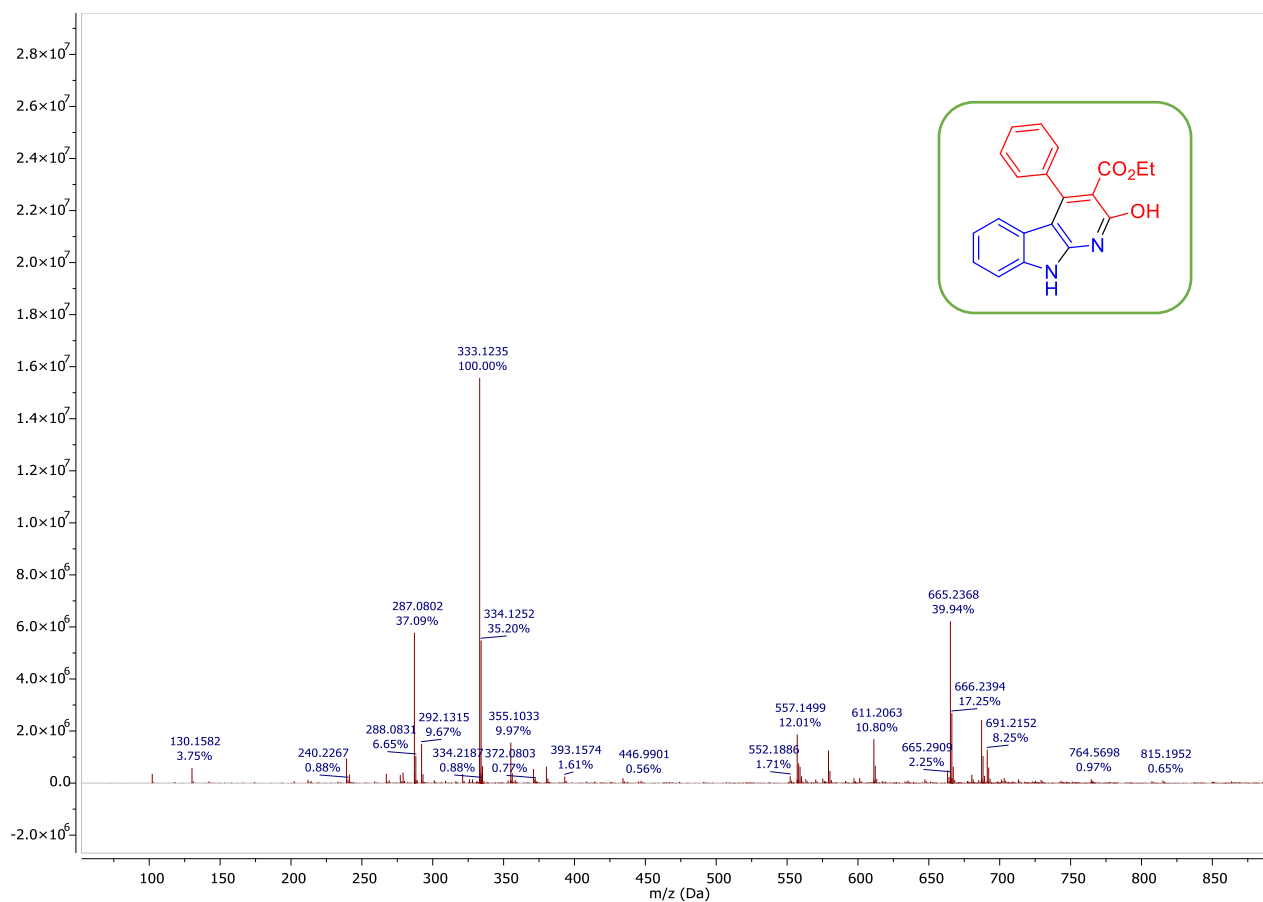

### HRMS spectrum of compound **3b**

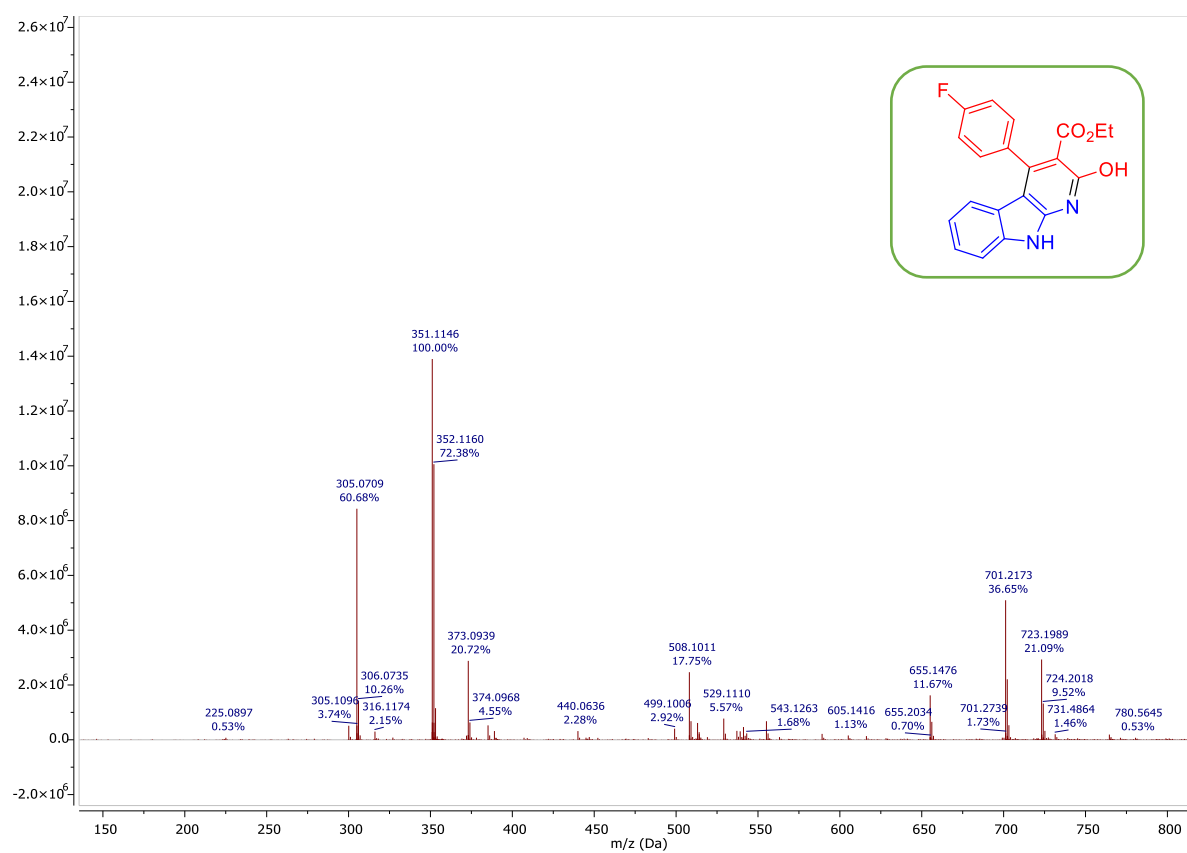

# HRMS spectrum of compound 3c

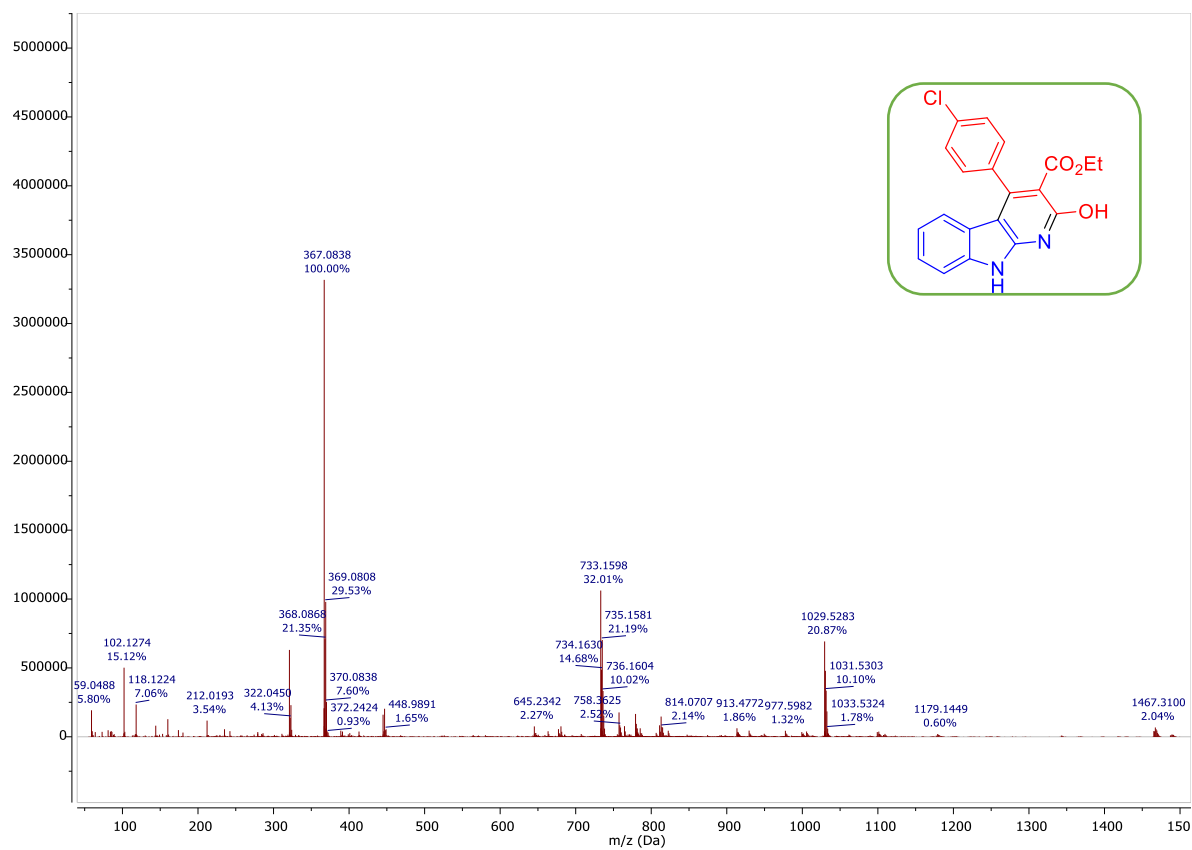

### HRMS spectrum of compound 3d

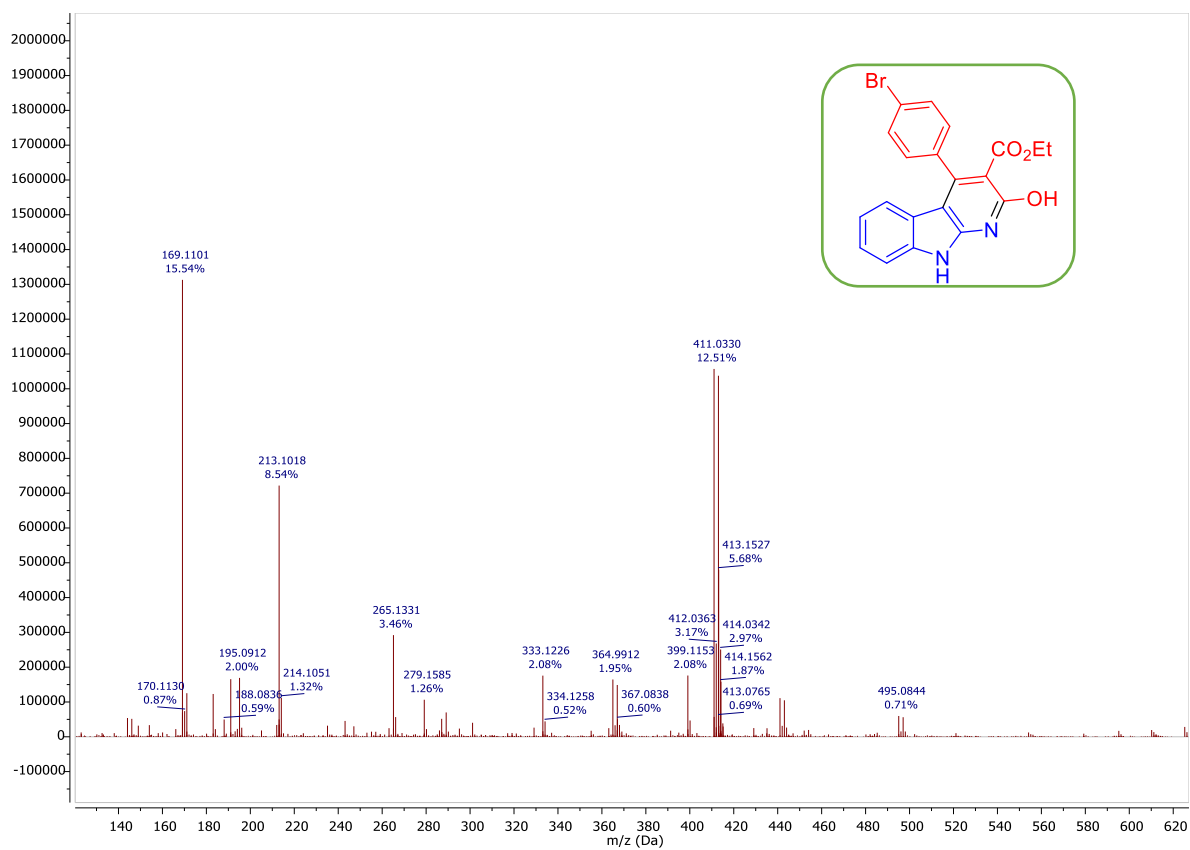

### HRMS spectrum of compound **3e**

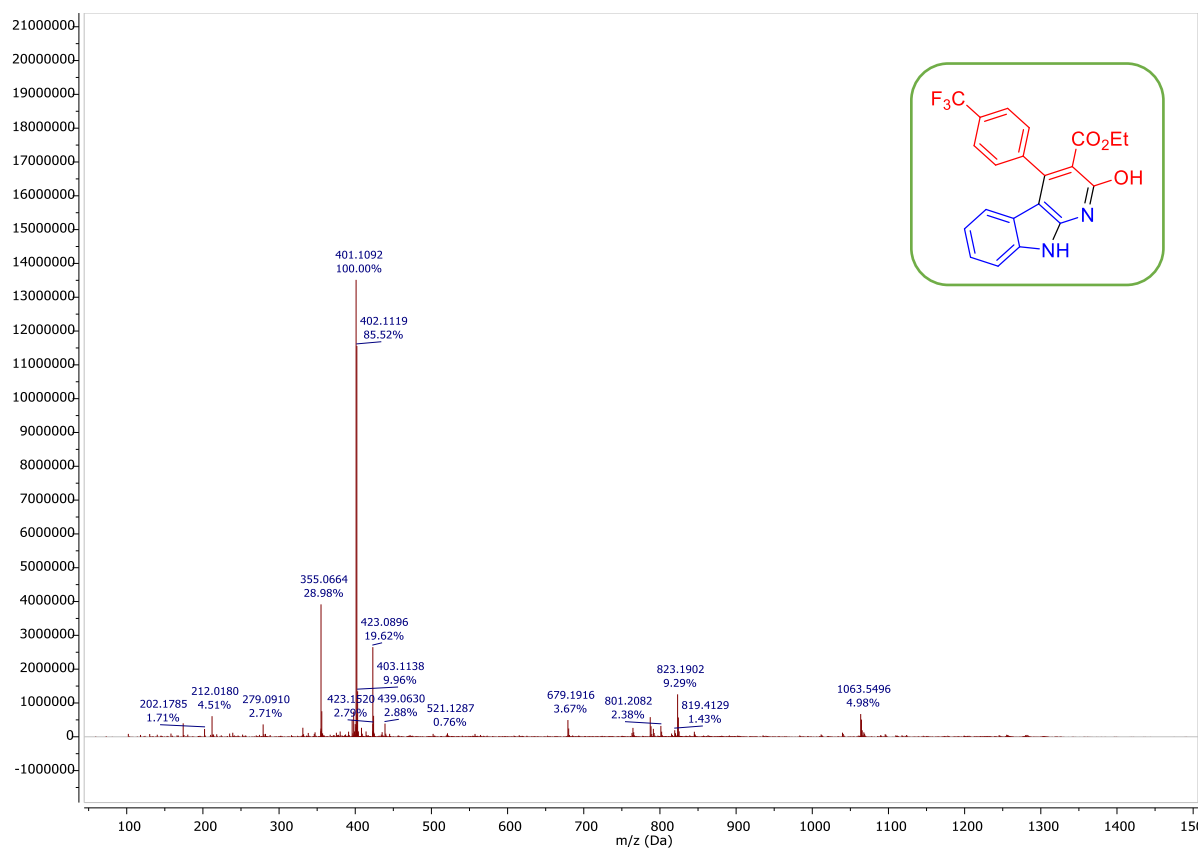

### HRMS spectrum of compound **3f**

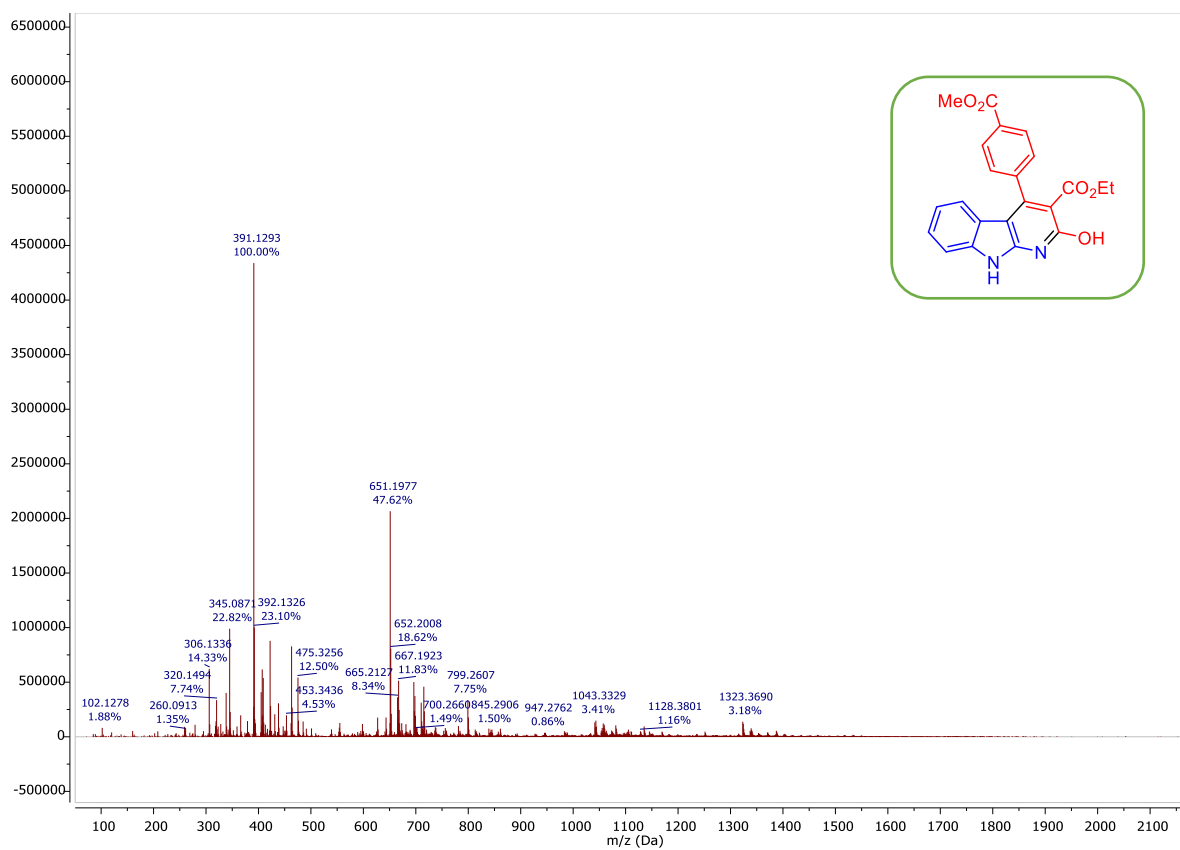

# HRMS spectrum of compound 3g

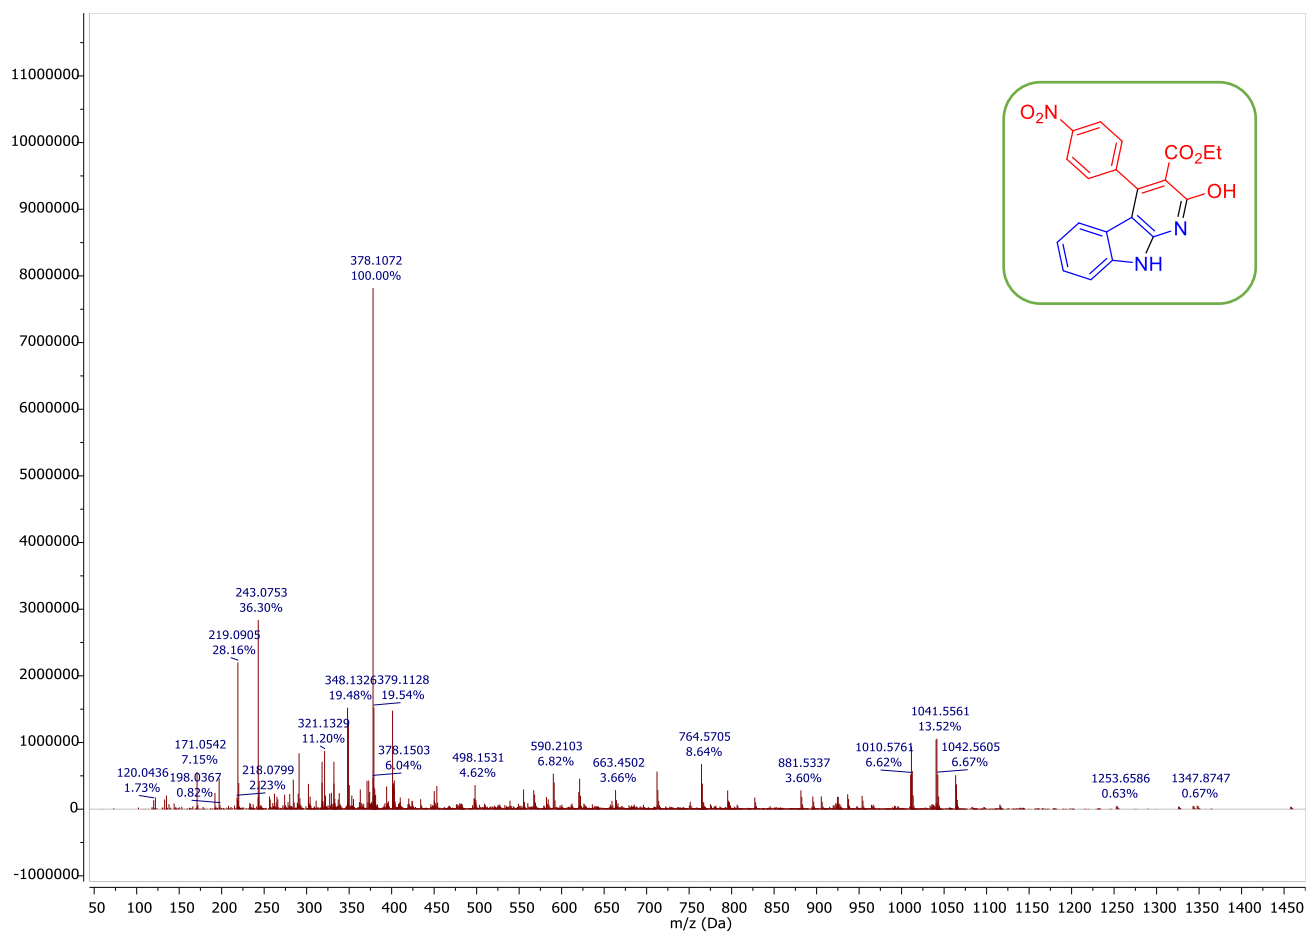

### HRMS spectrum of compound **3h**

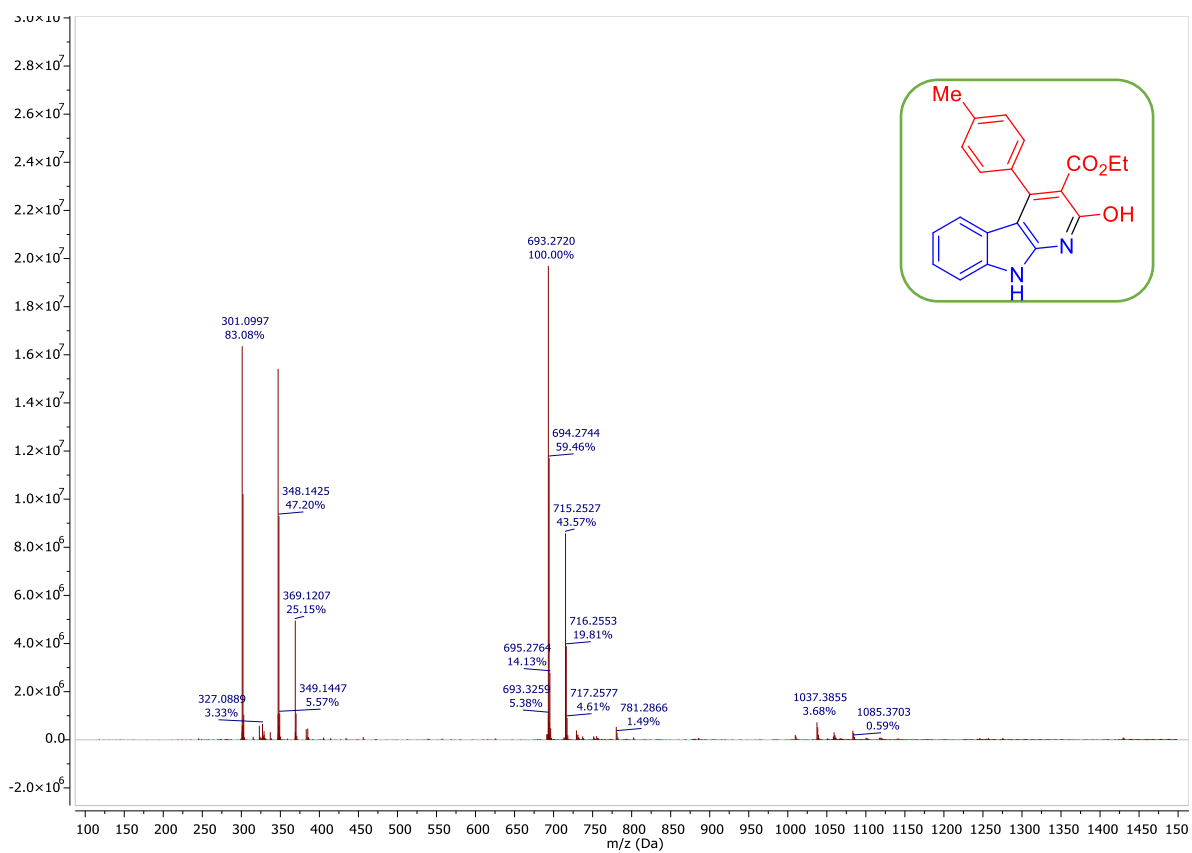

### HRMS spectrum of compound **3i**

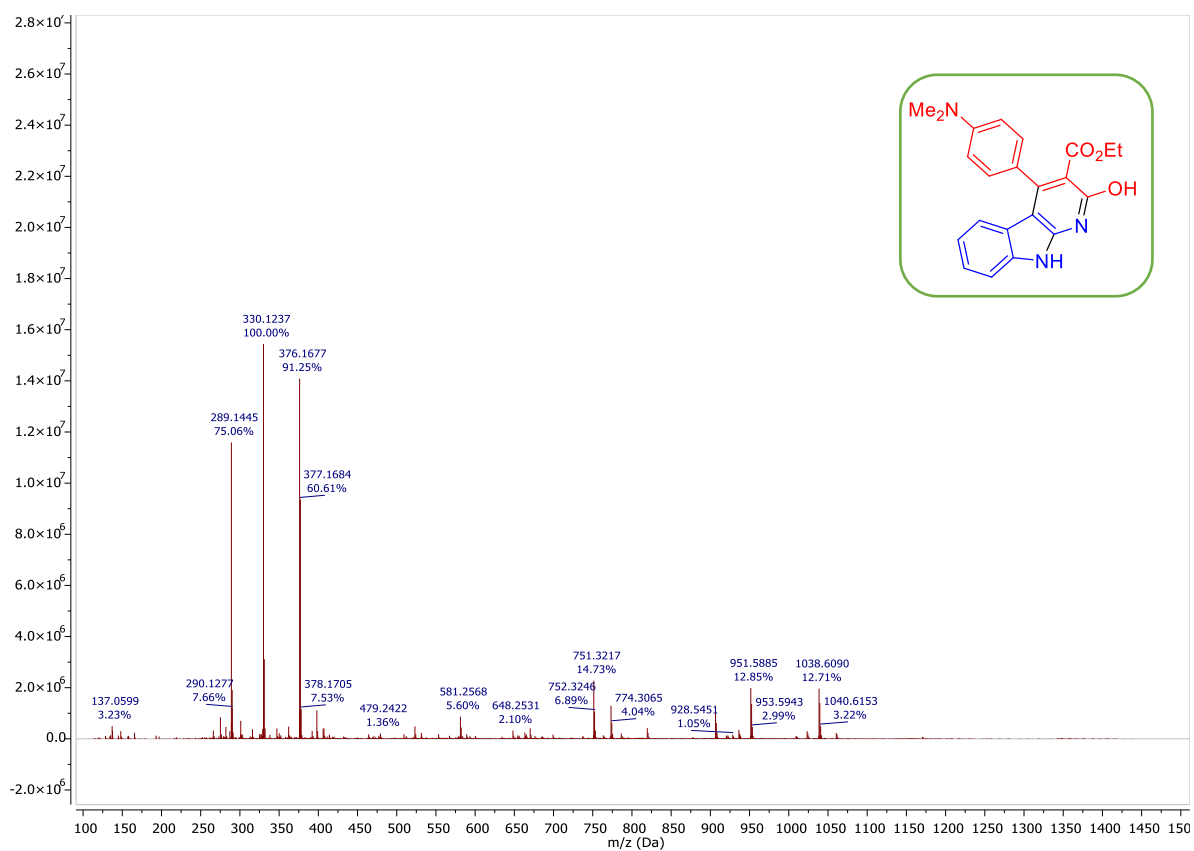

### HRMS spectrum of compound 3j

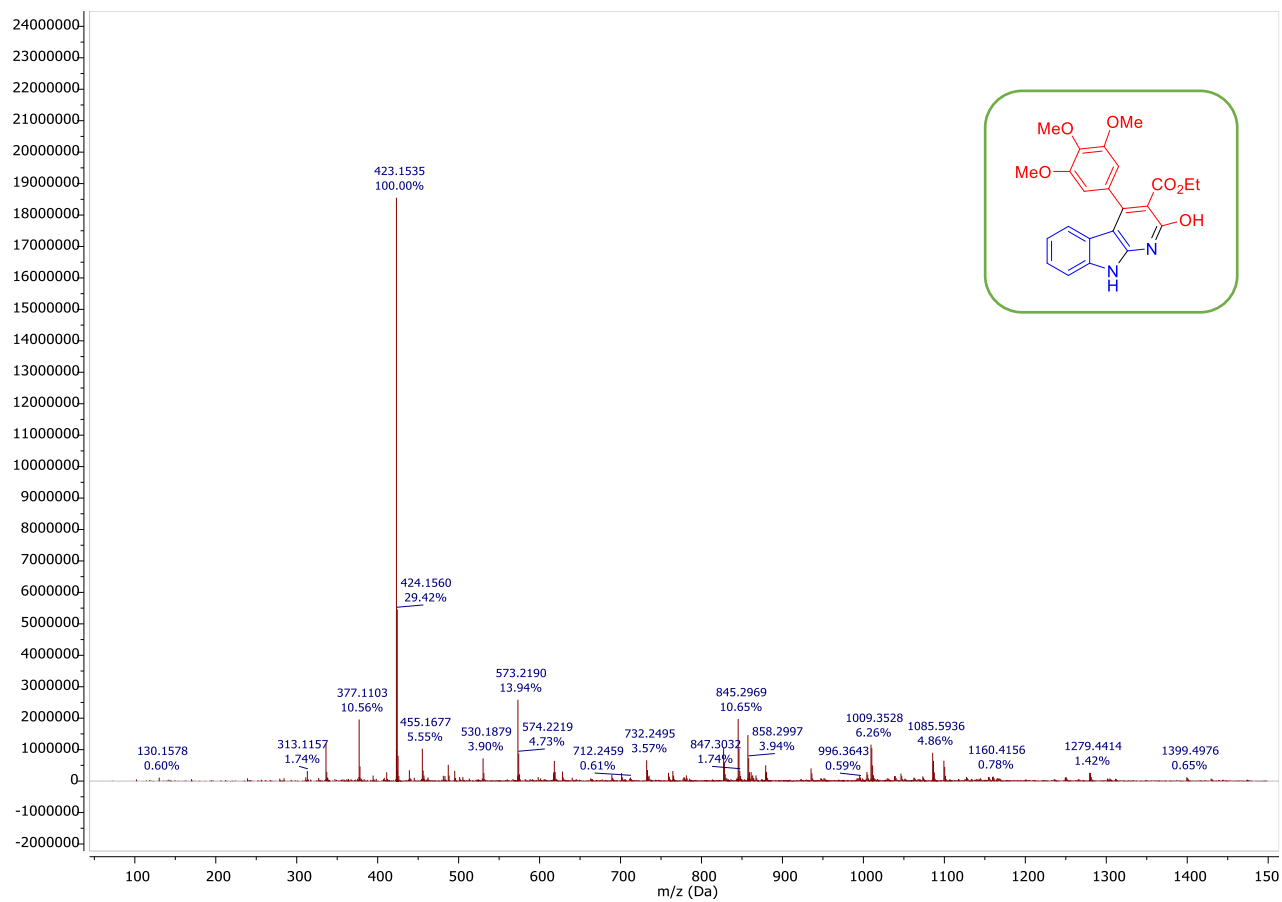

# HRMS spectrum of compound 3k

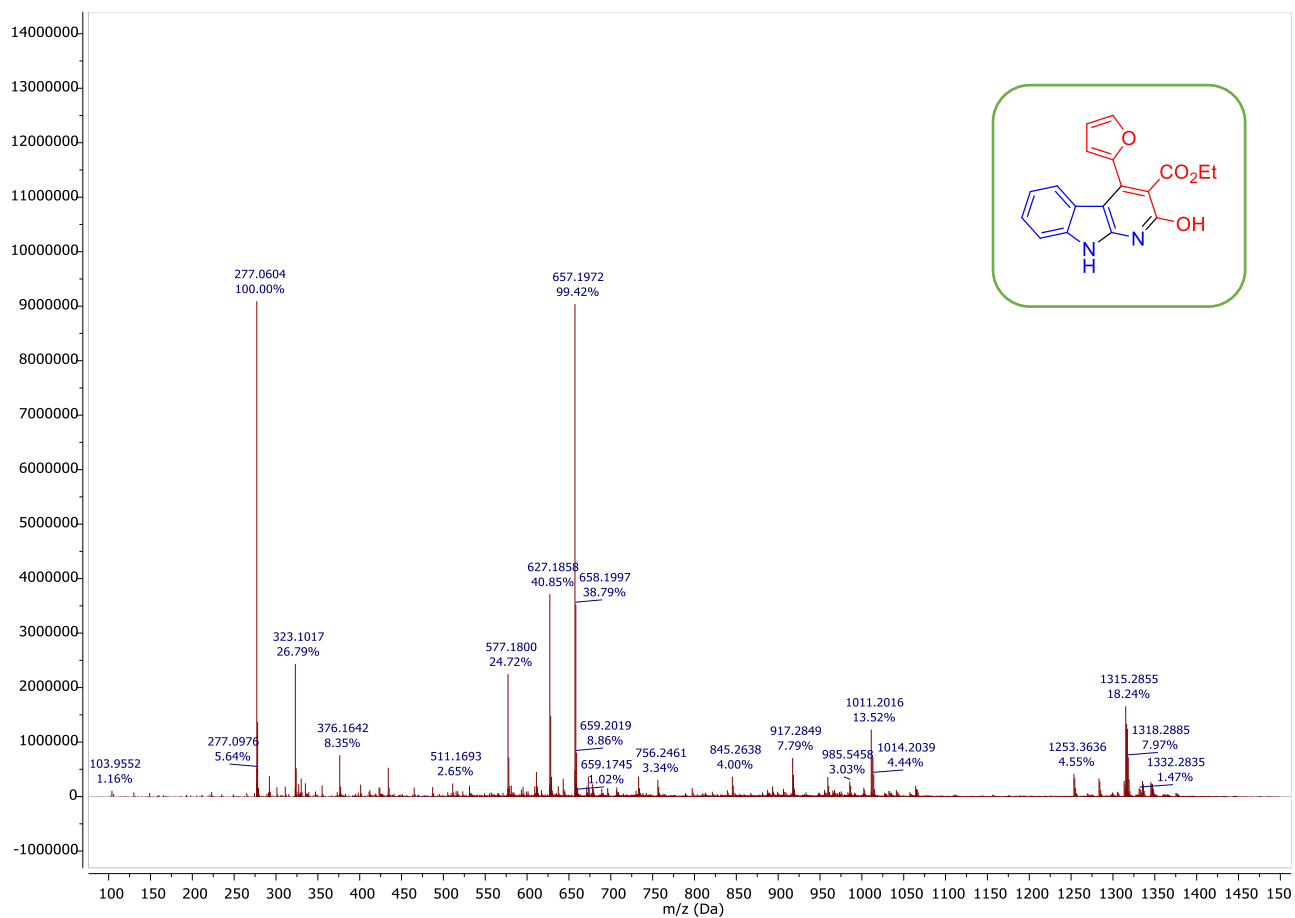

# HRMS spectrum of compound 31

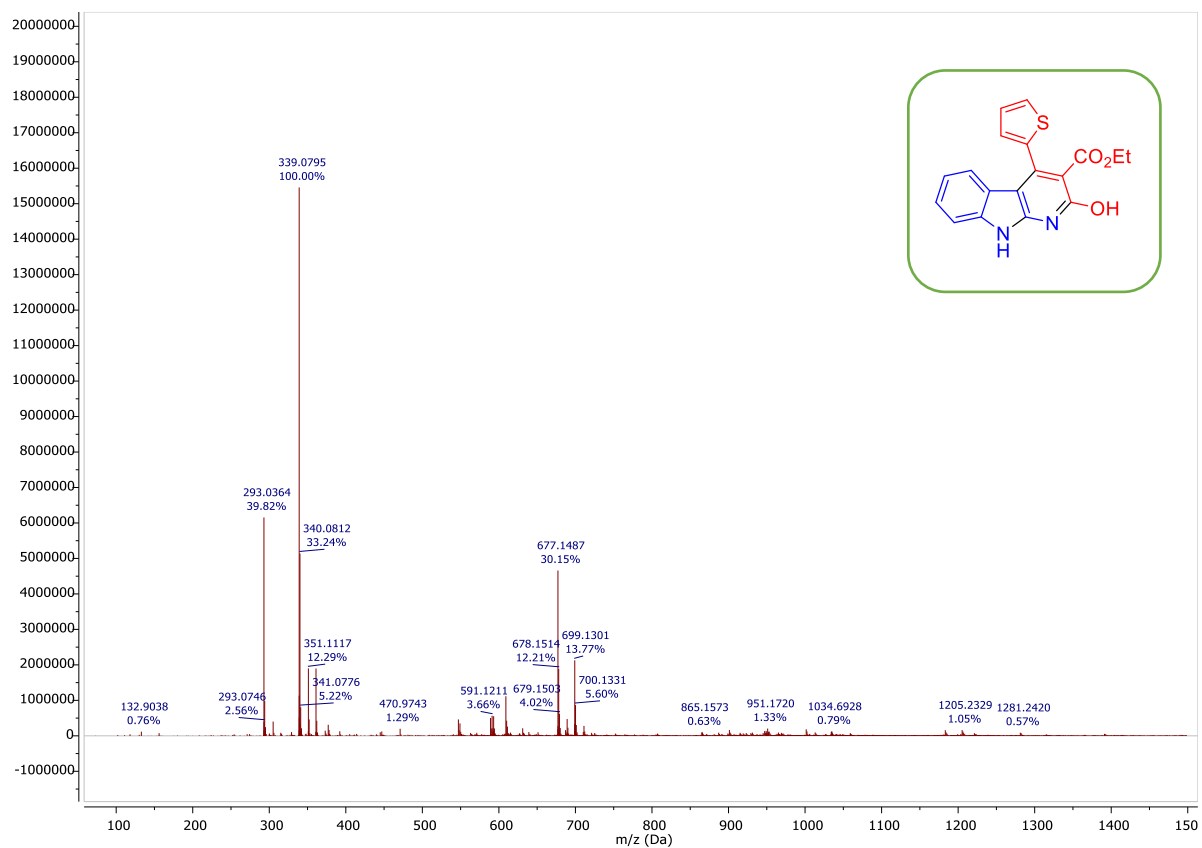

### HRMS spectrum of compound **3m**

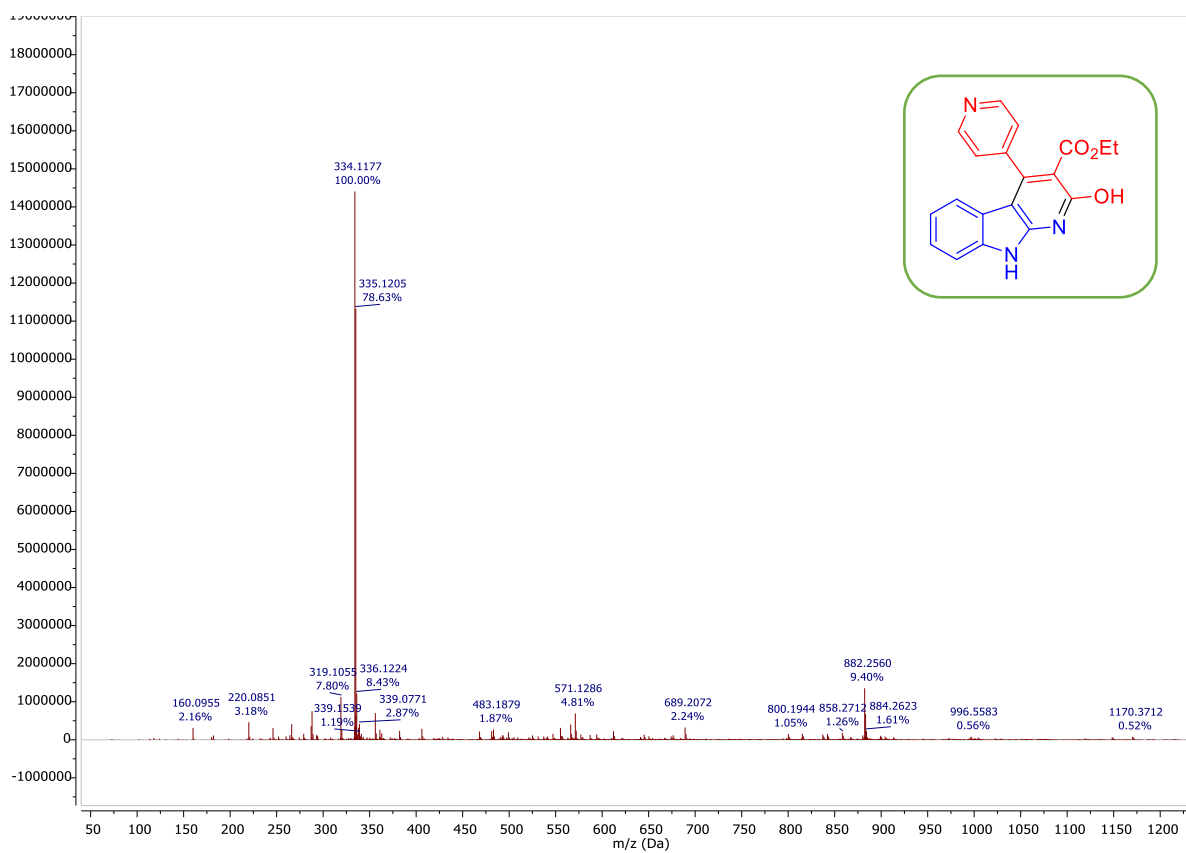

### HRMS spectrum of compound 3n

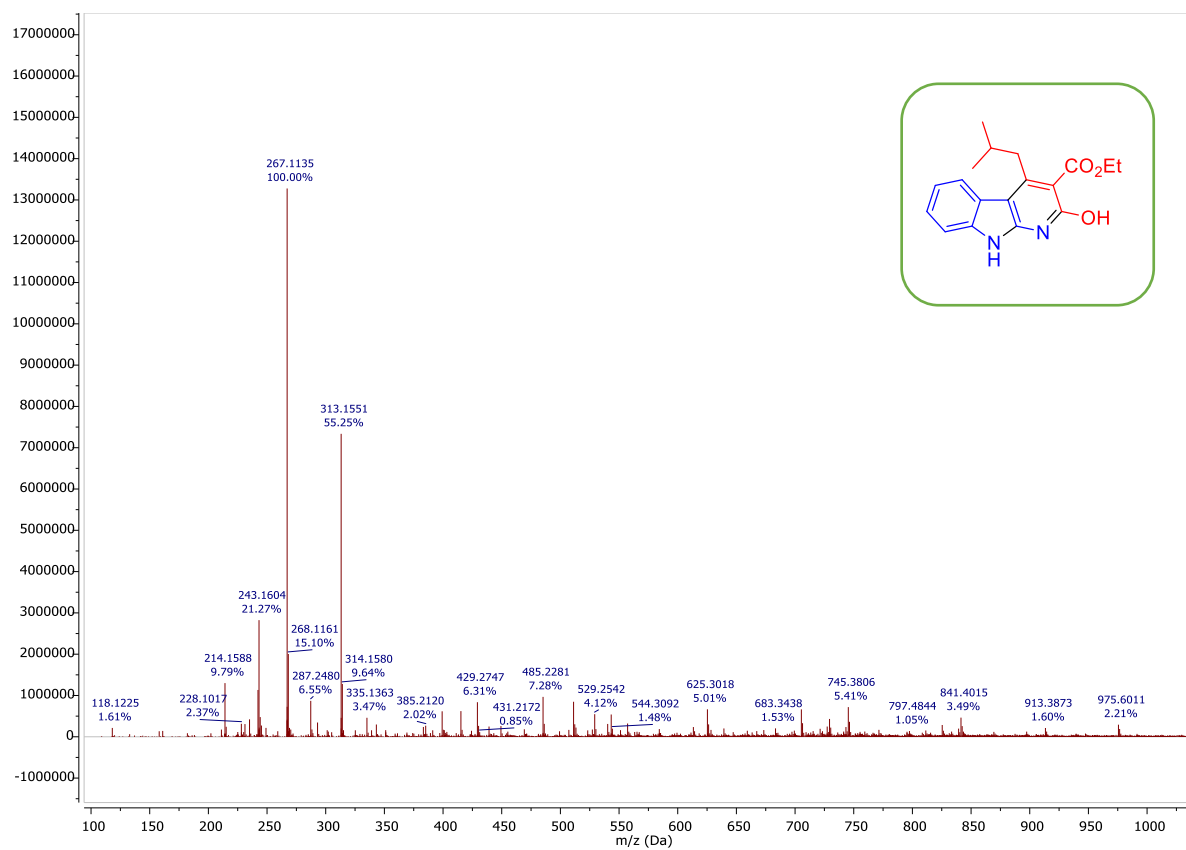

### HRMS spectrum of compound **30**

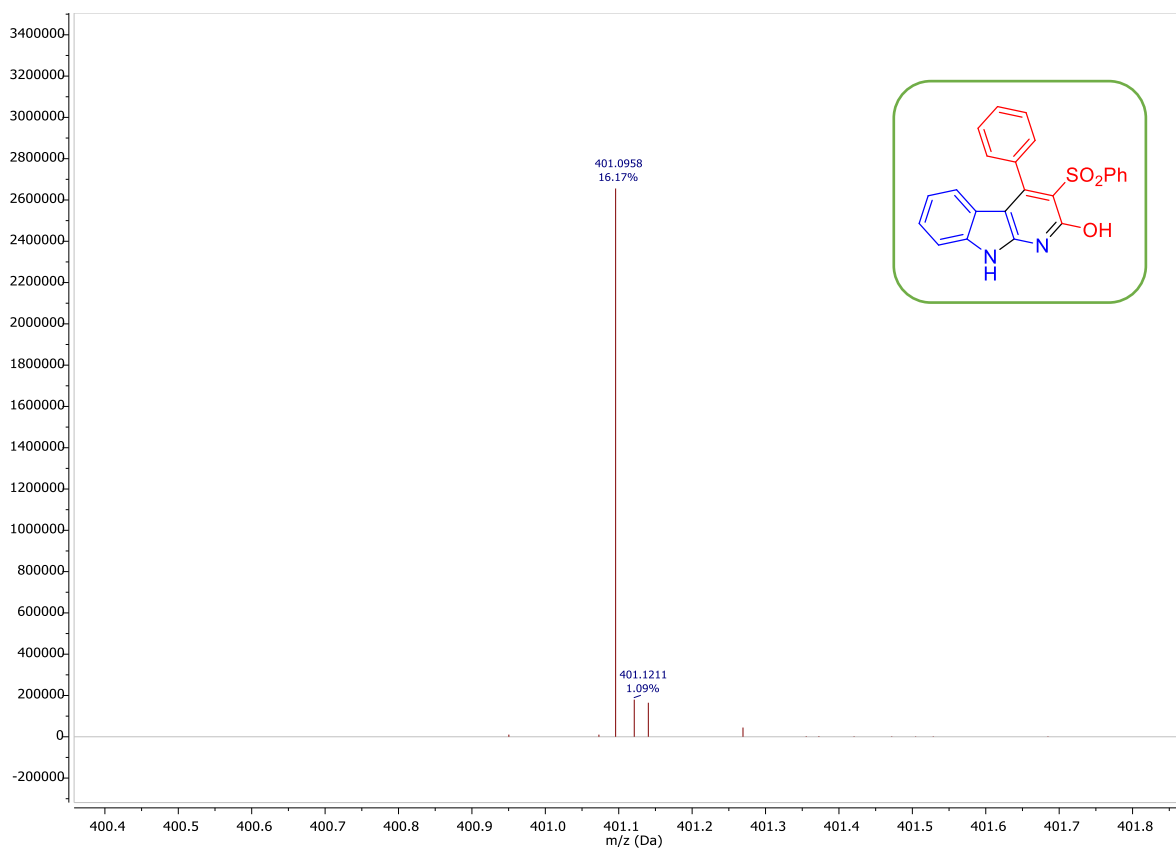

# HRMS spectrum of compound 3p

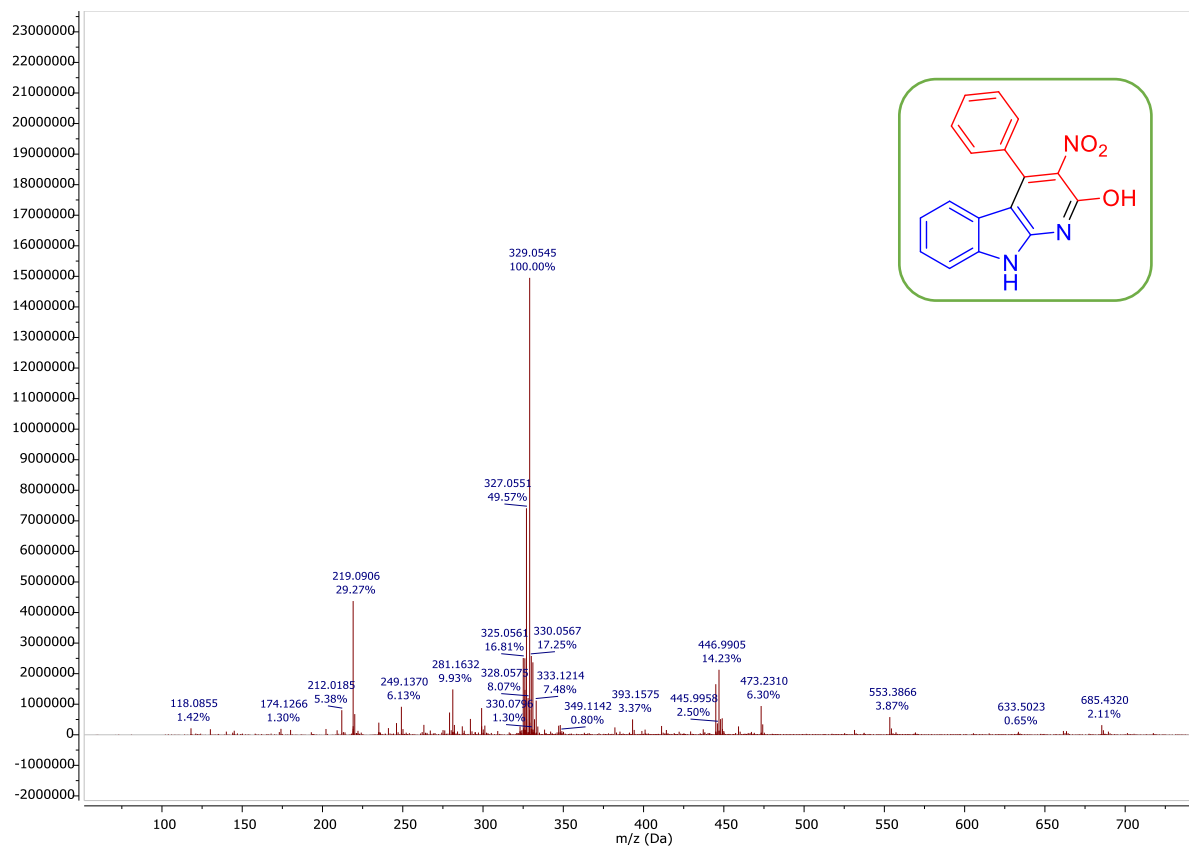

### HRMS spectrum of compound **3q**

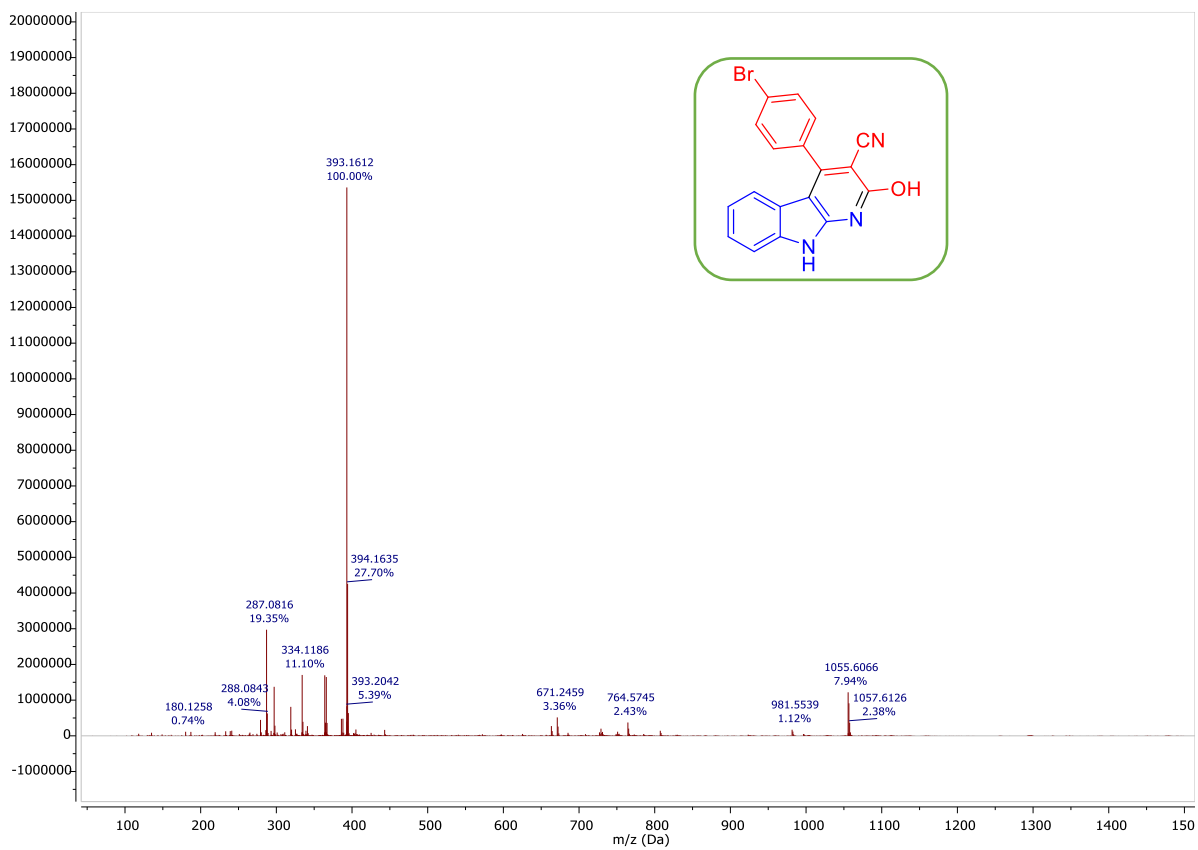

### HRMS spectrum of compound 3r

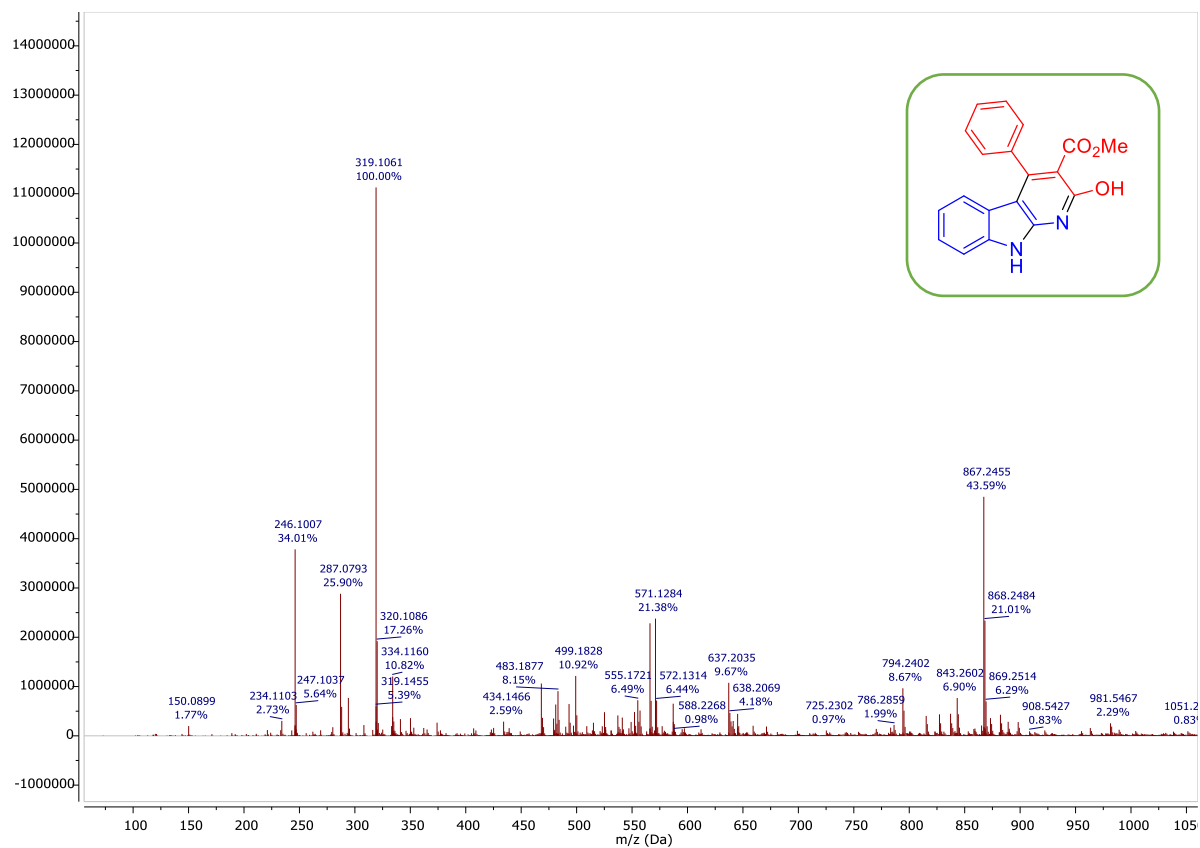

### HRMS spectrum of compound 3s

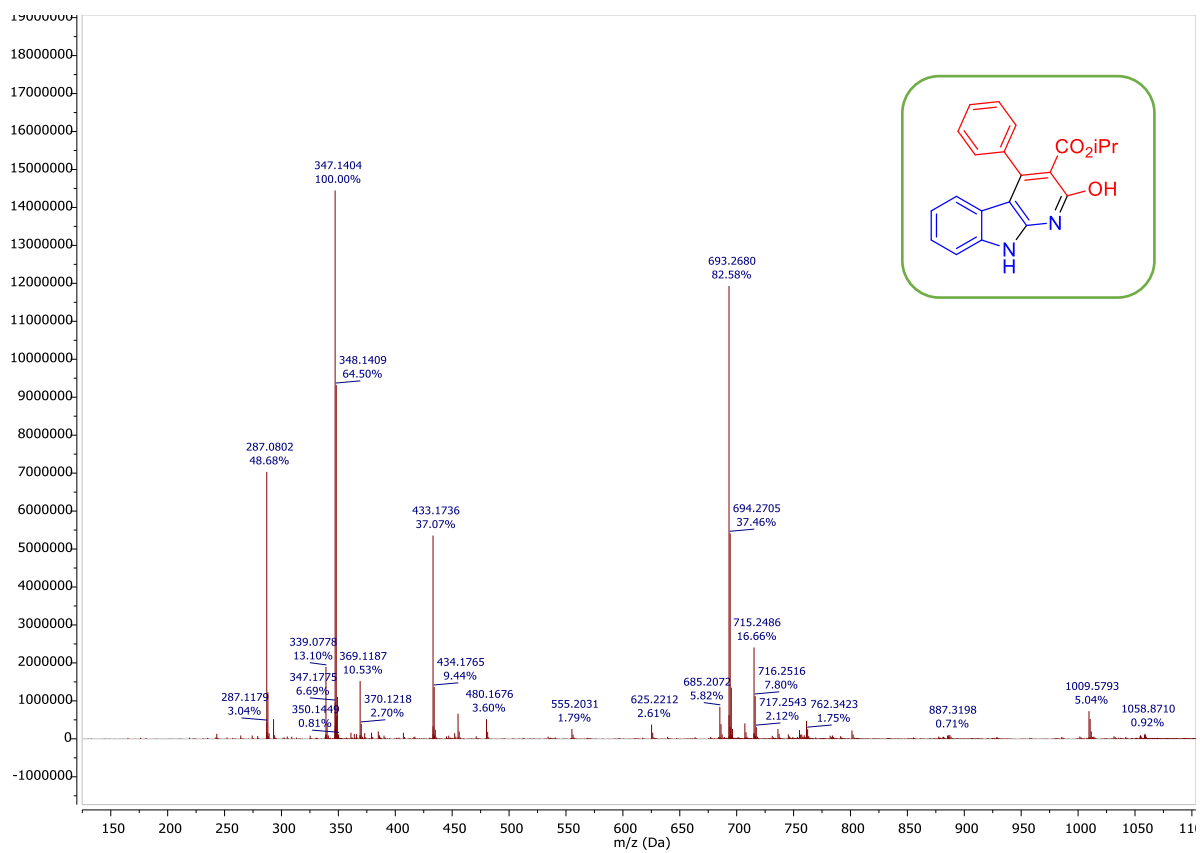

# HRMS spectrum of compound 3t

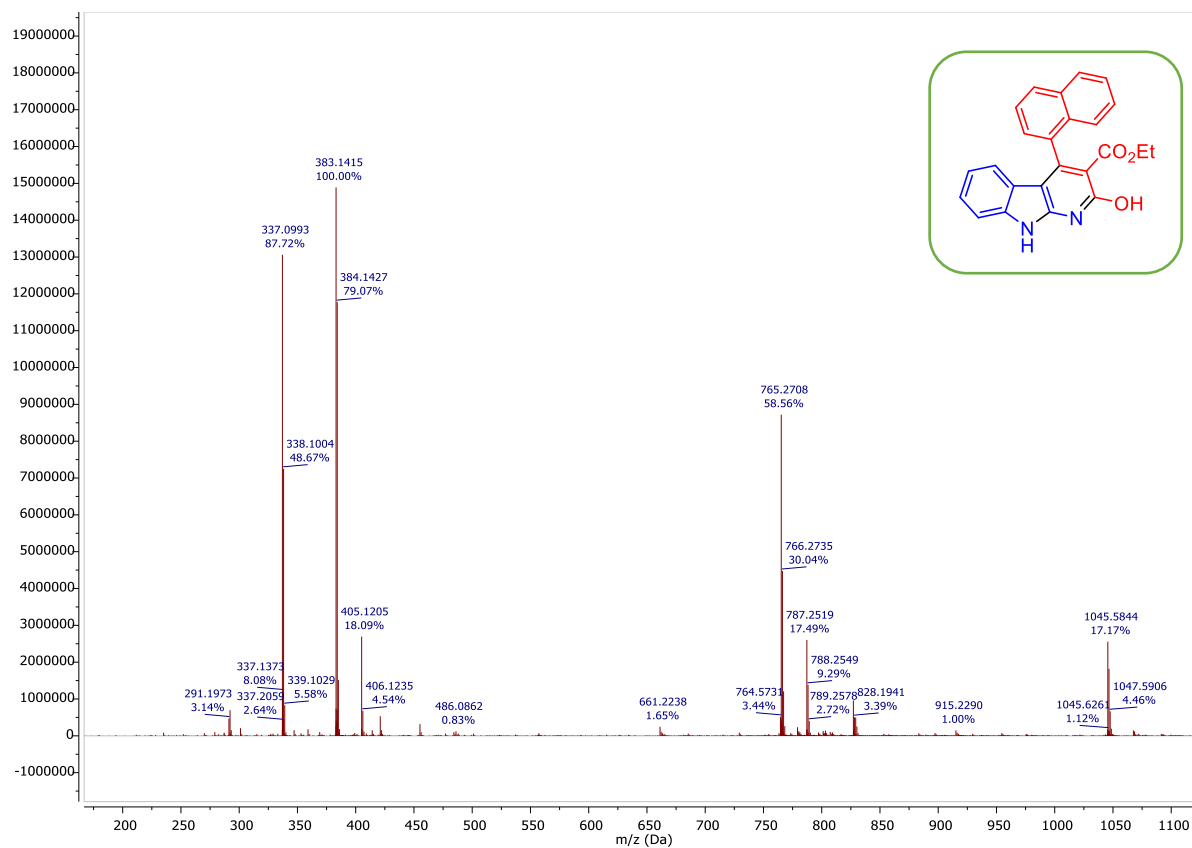

# HRMS spectrum of compound 3u

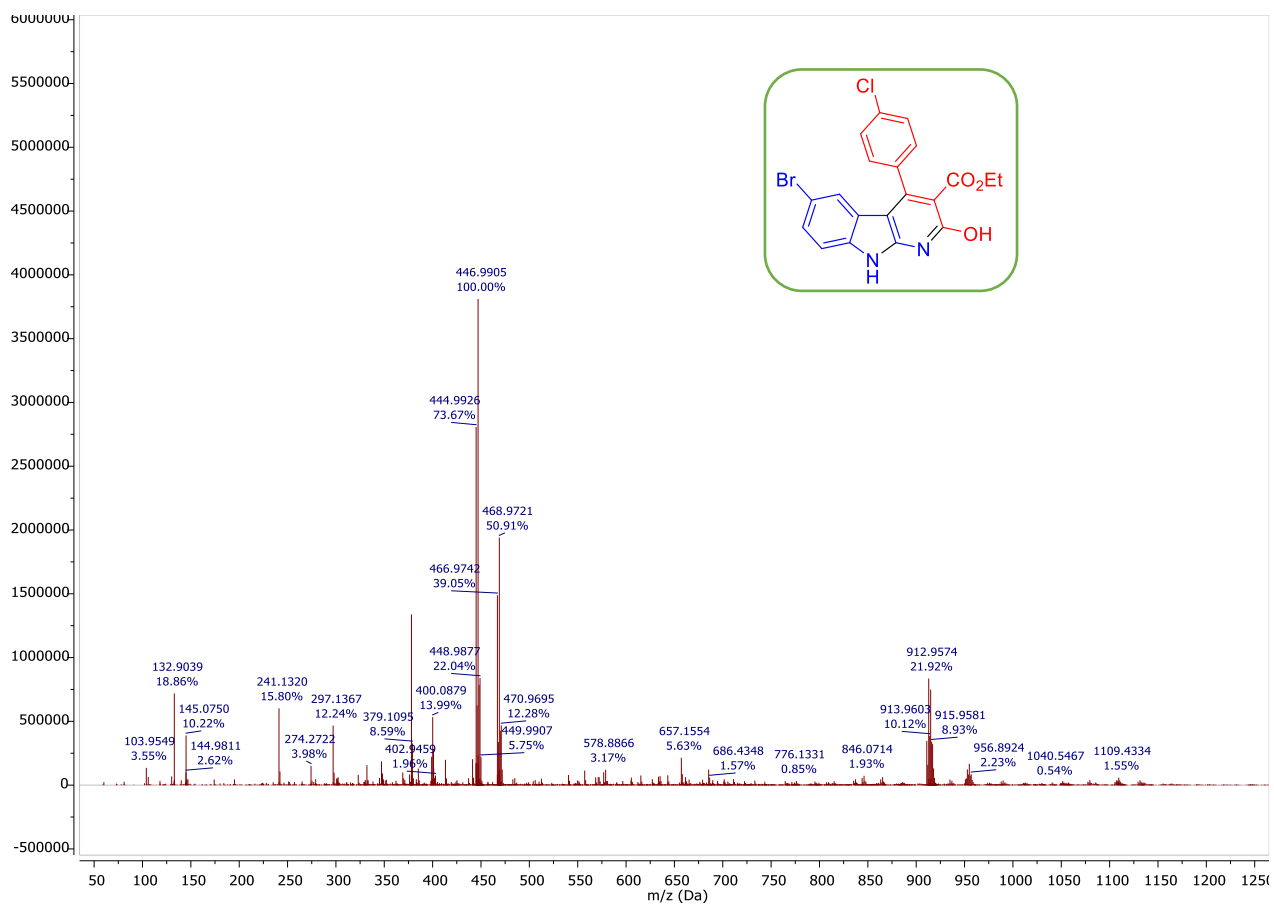

# HRMS spectrum of compound 3v

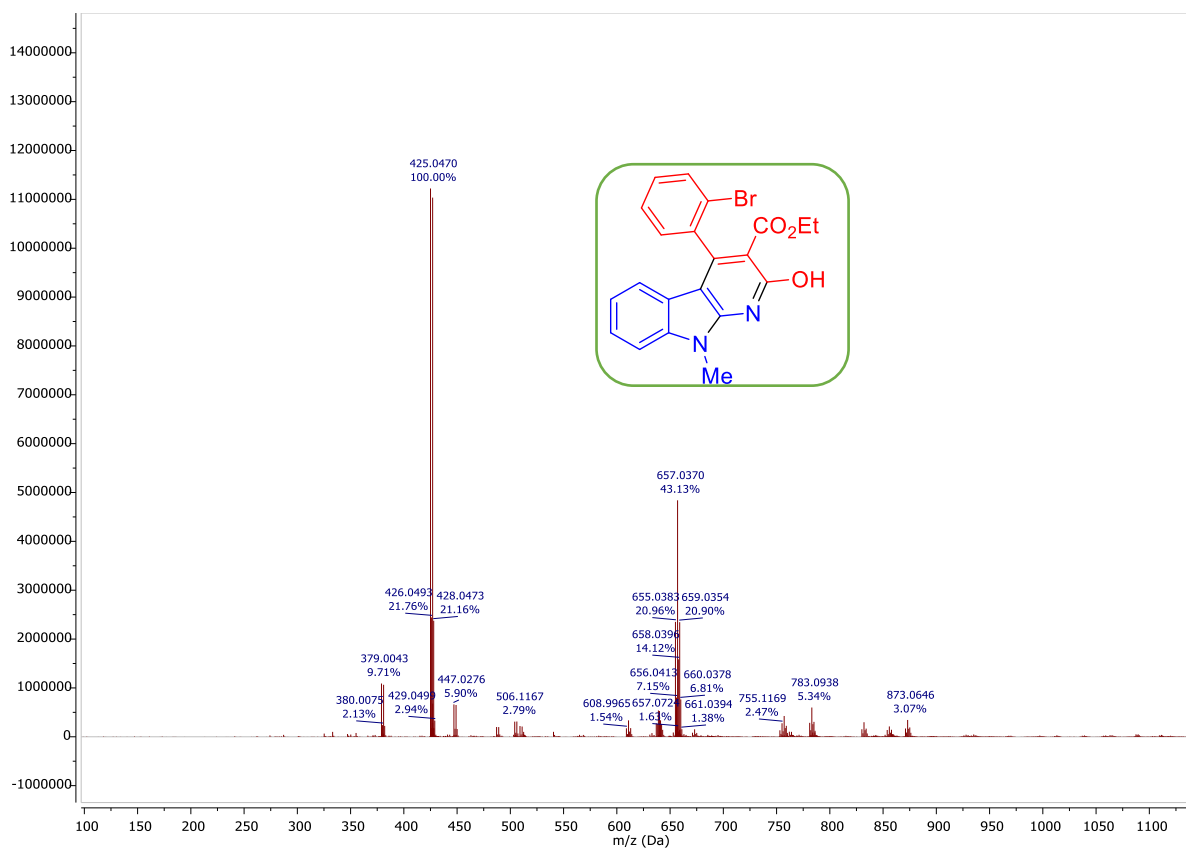

### HRMS spectrum of compound **5a**

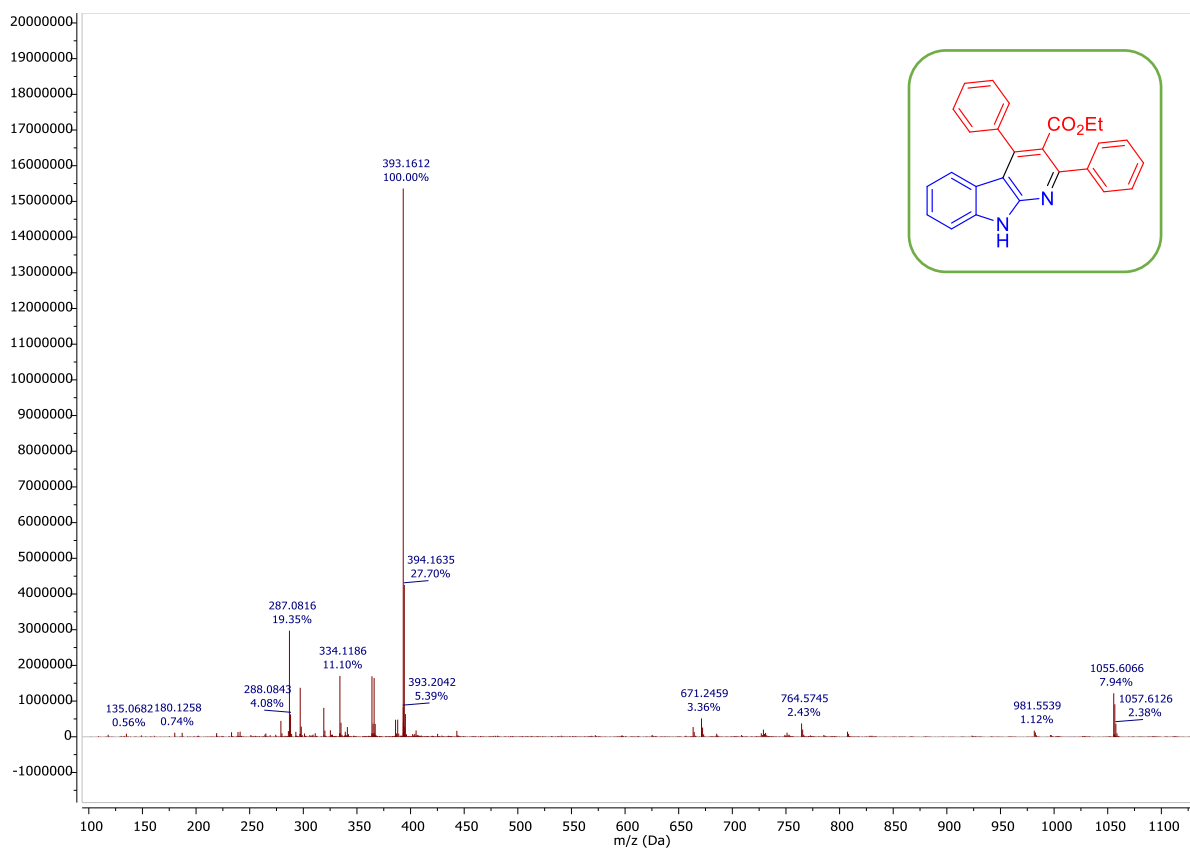

### HRMS spectrum of compound **5b**

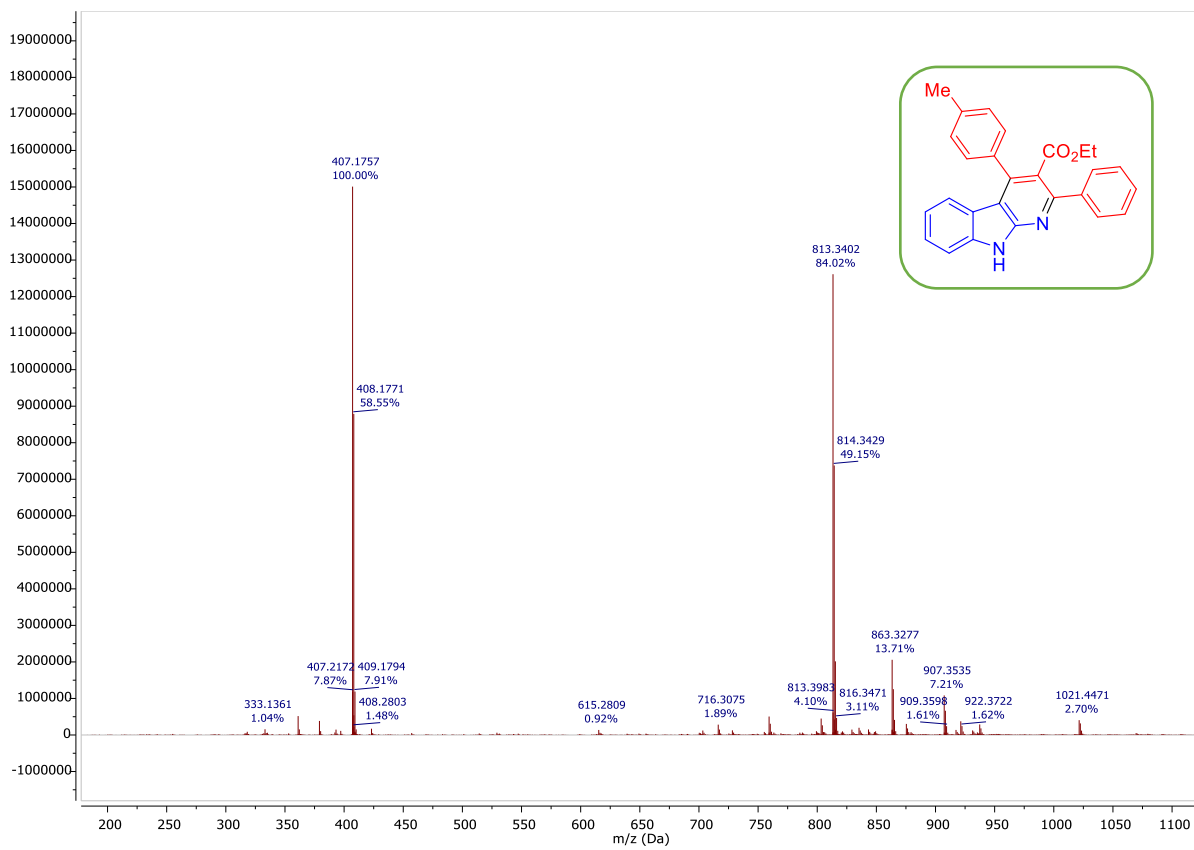

# HRMS spectrum of compound 5c

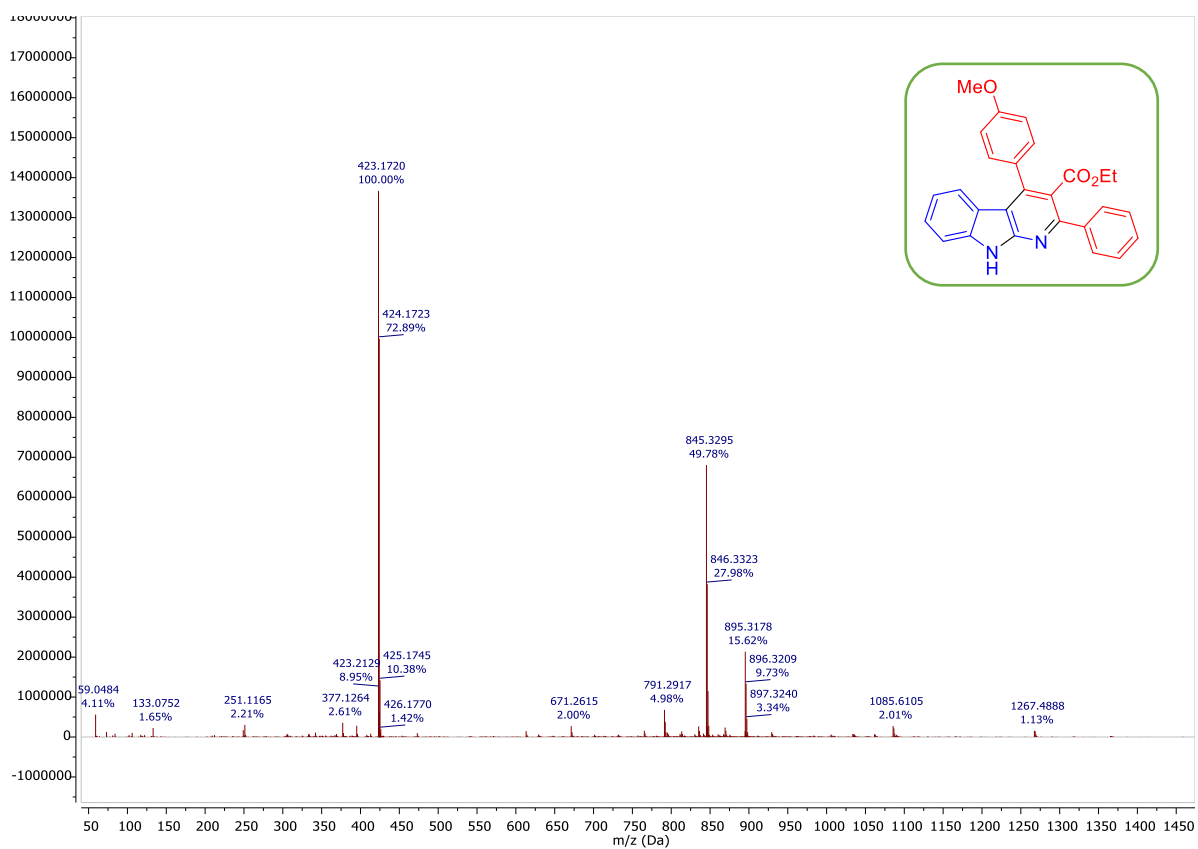

# HRMS spectrum of compound 5d

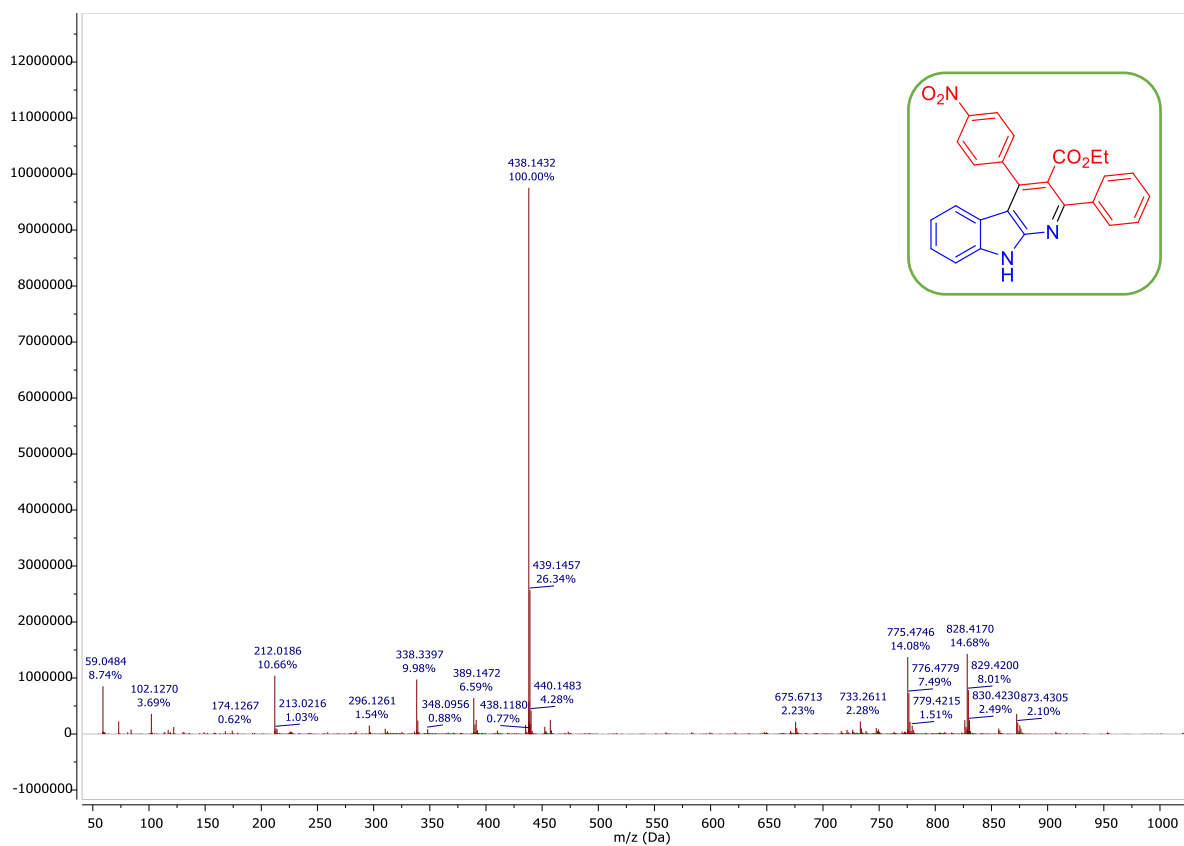

# HRMS spectrum of compound 5e

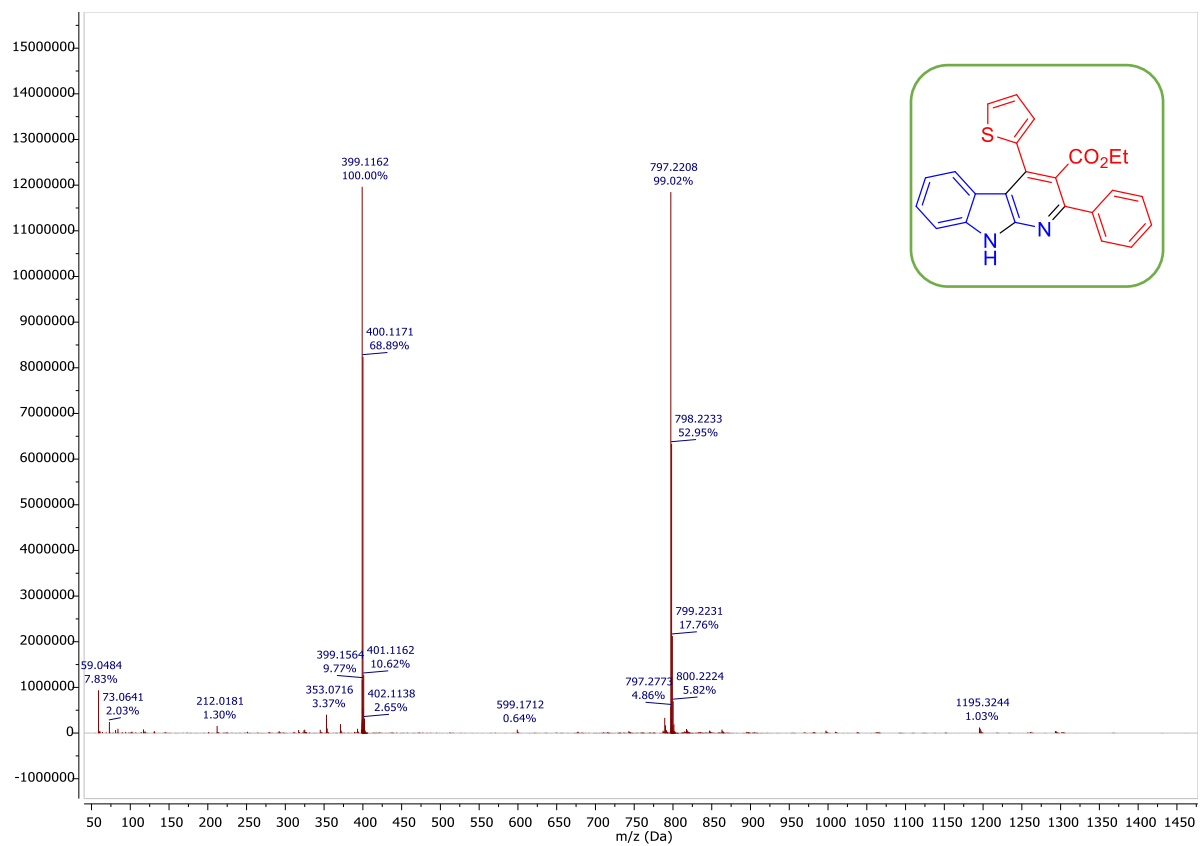

# HRMS spectrum of compound 5f

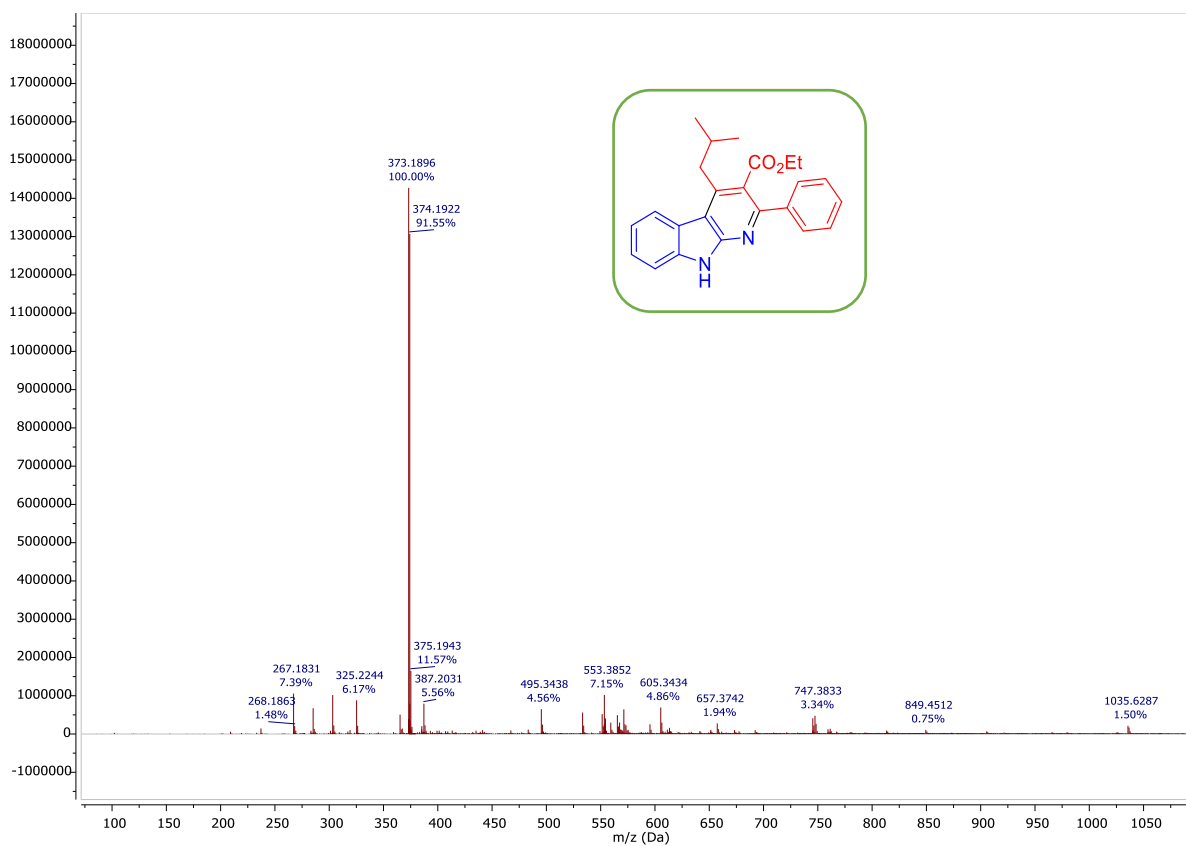

### HRMS spectrum of compound **5g**

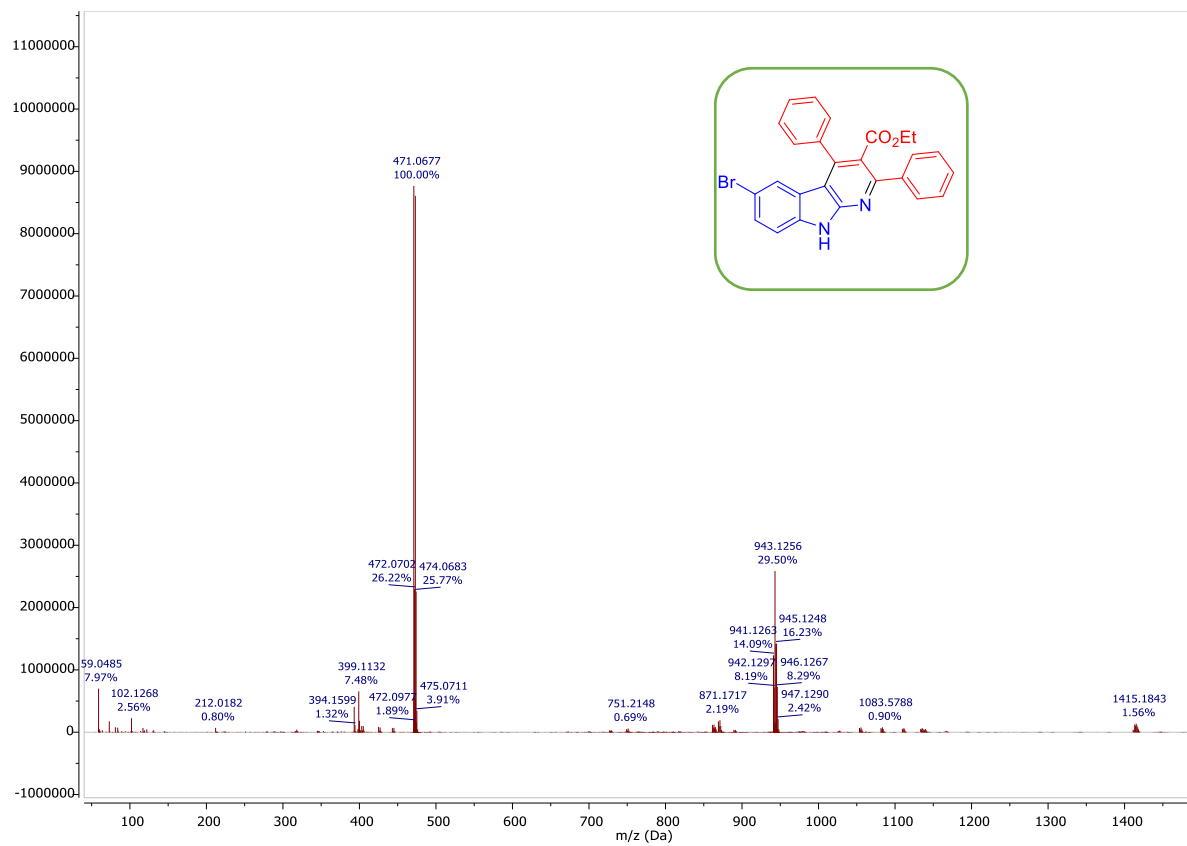

### HRMS spectrum of compound **5h**

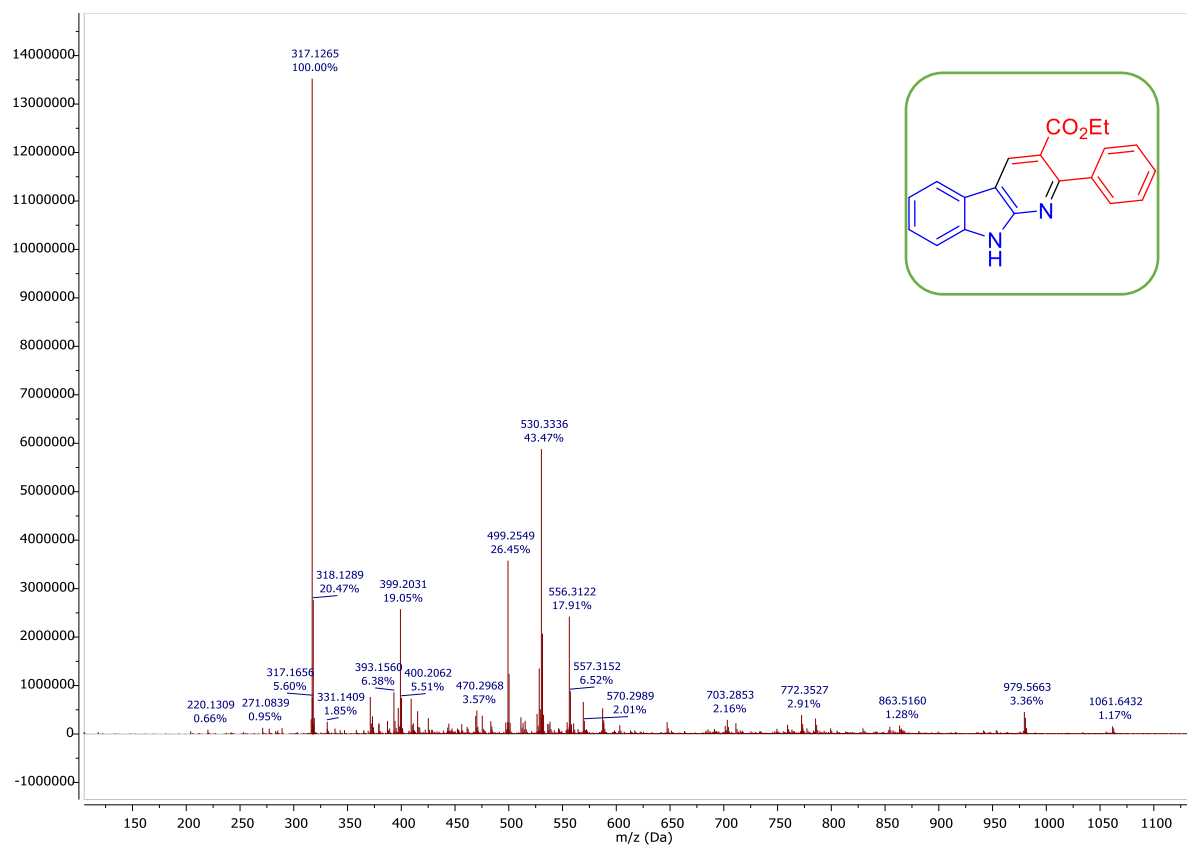

# HRMS spectrum of compound 6a

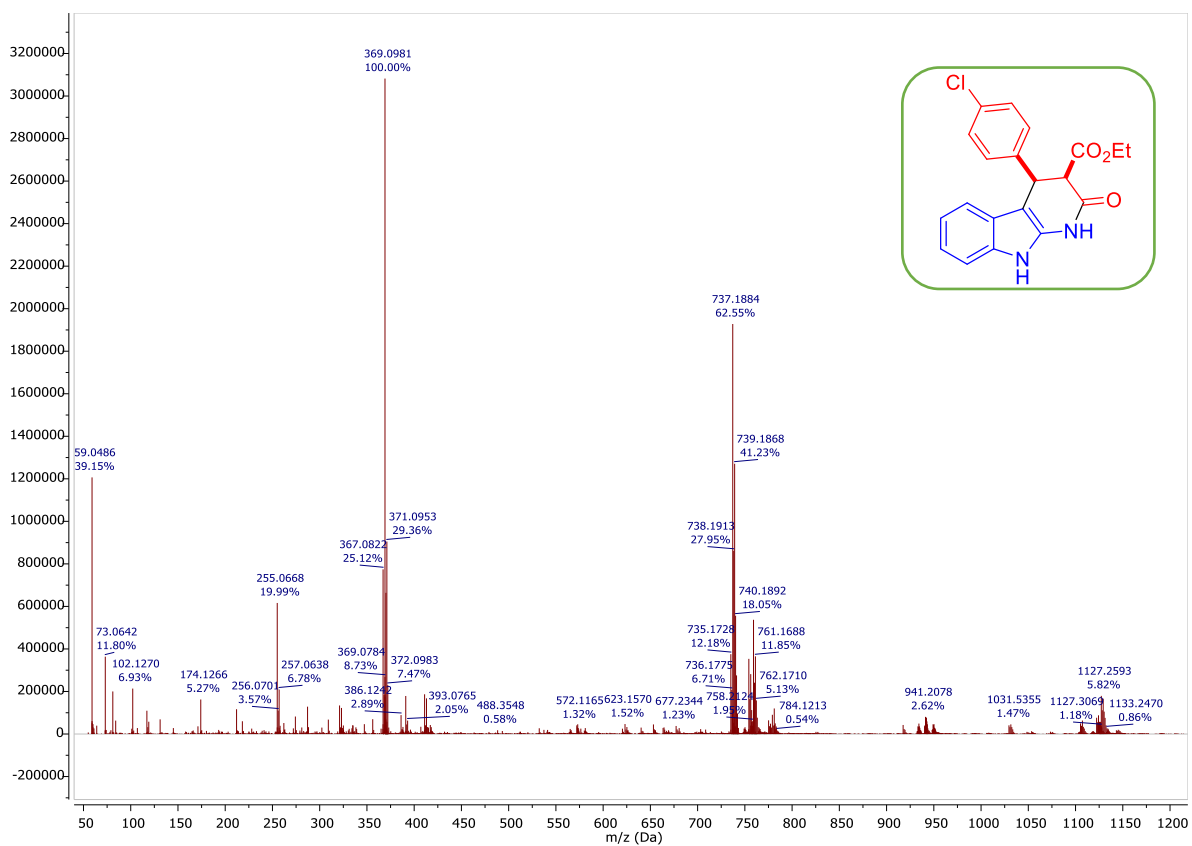

### HRMS spectrum of compound **6b**

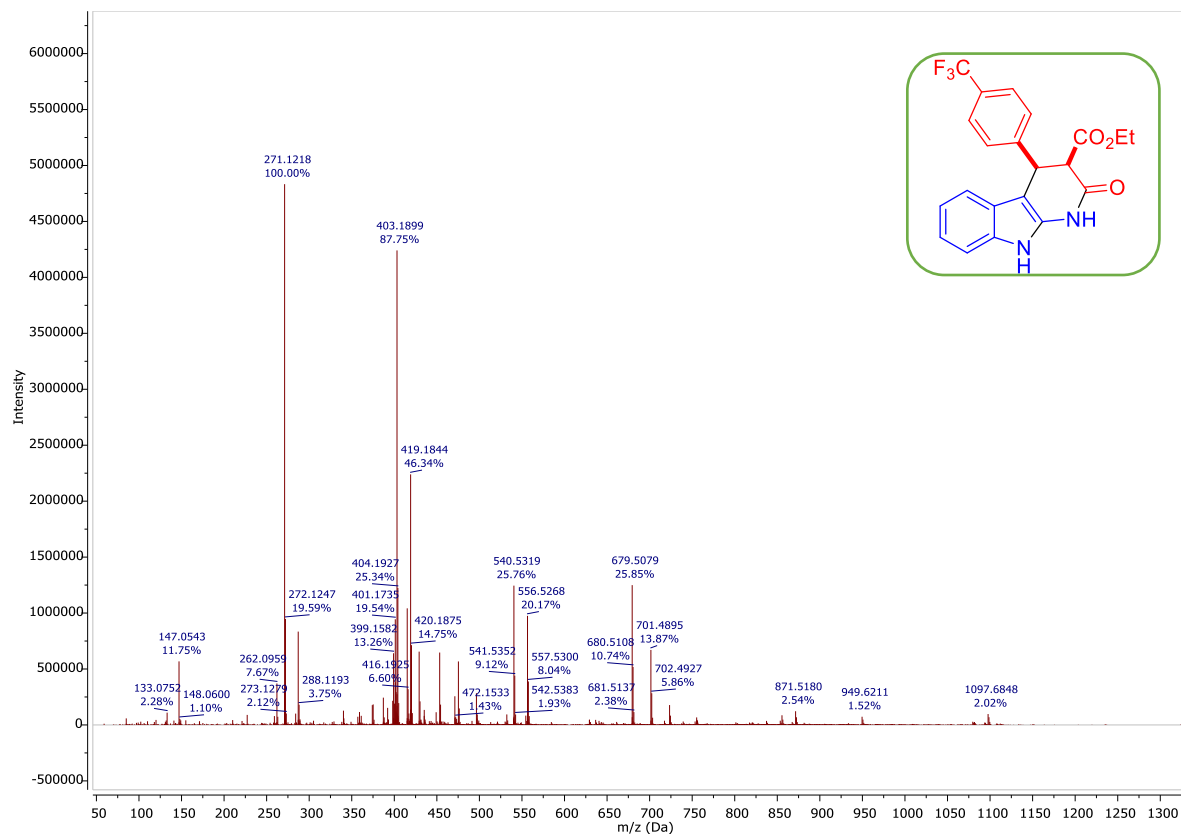

# HRMS spectrum of compound 6c

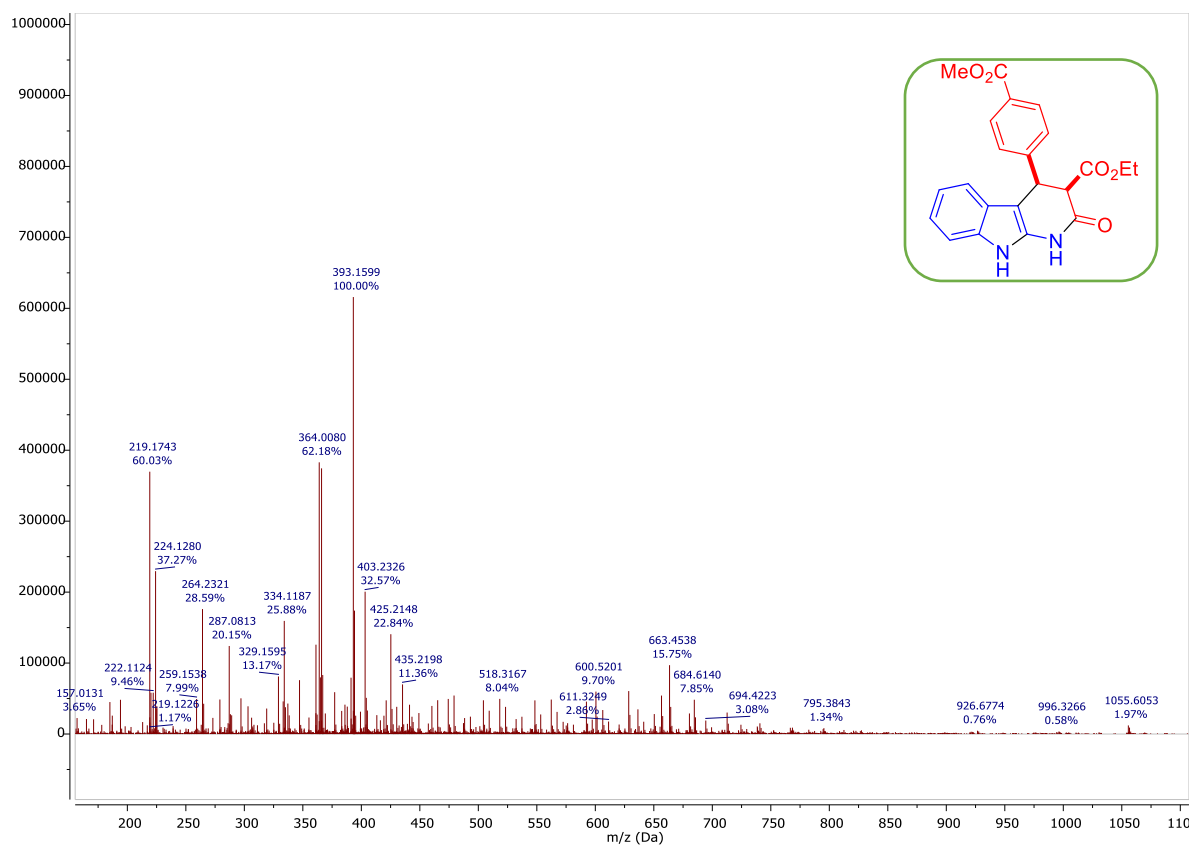

# HRMS spectrum of compound 6d

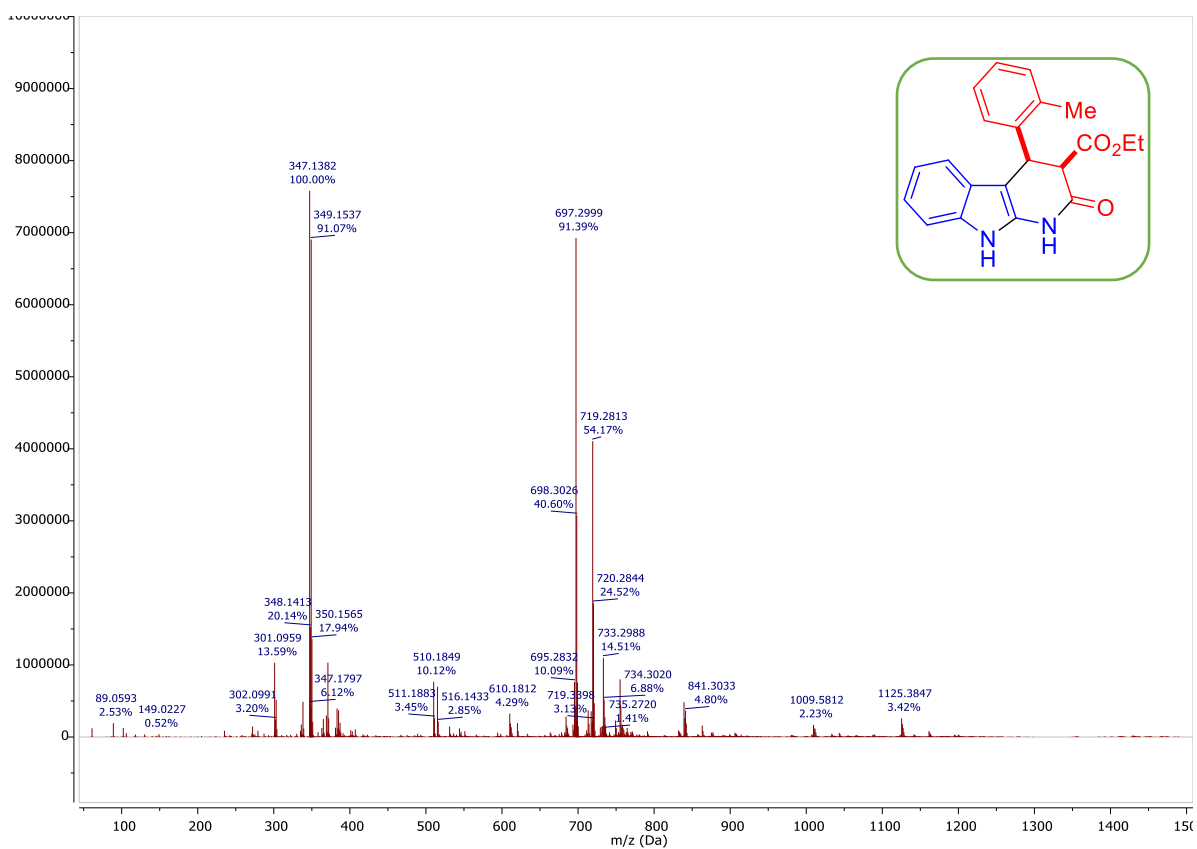

# HRMS spectrum of compound 6e

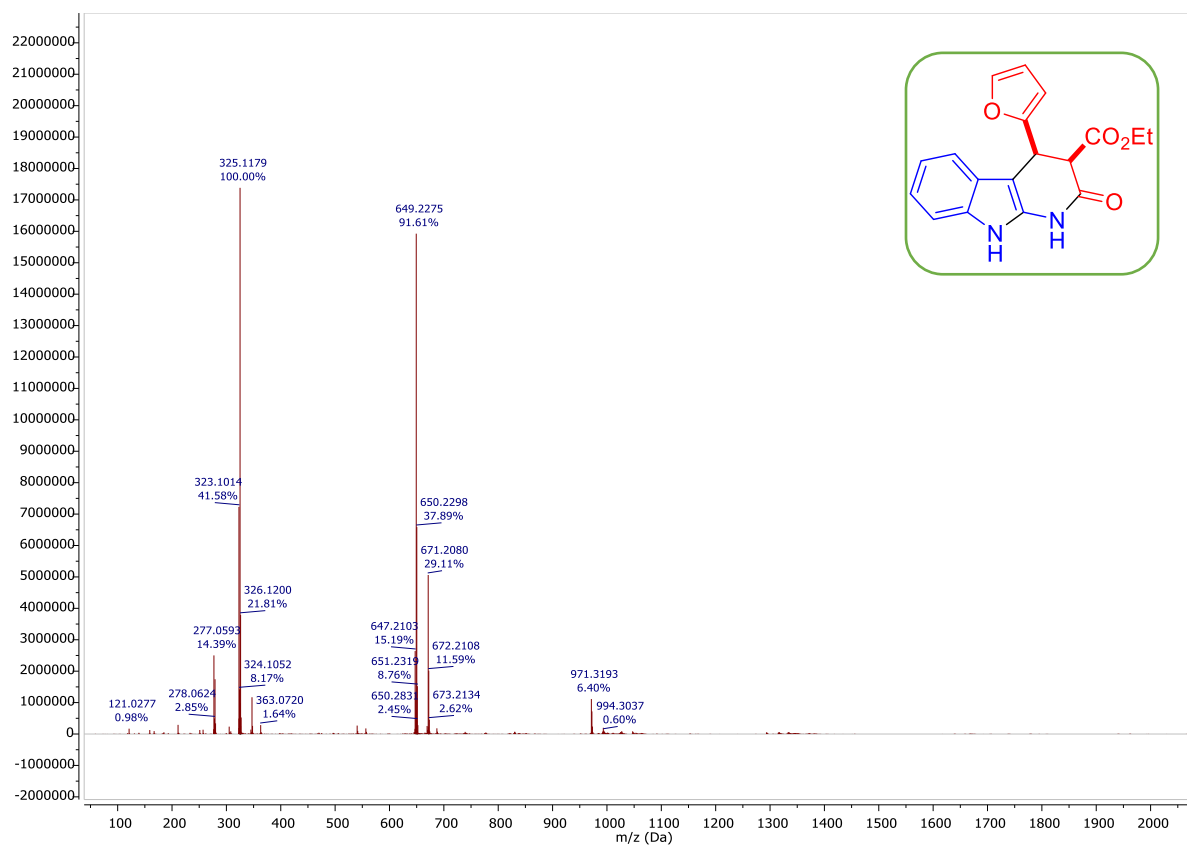

# HRMS spectrum of compound **6f**

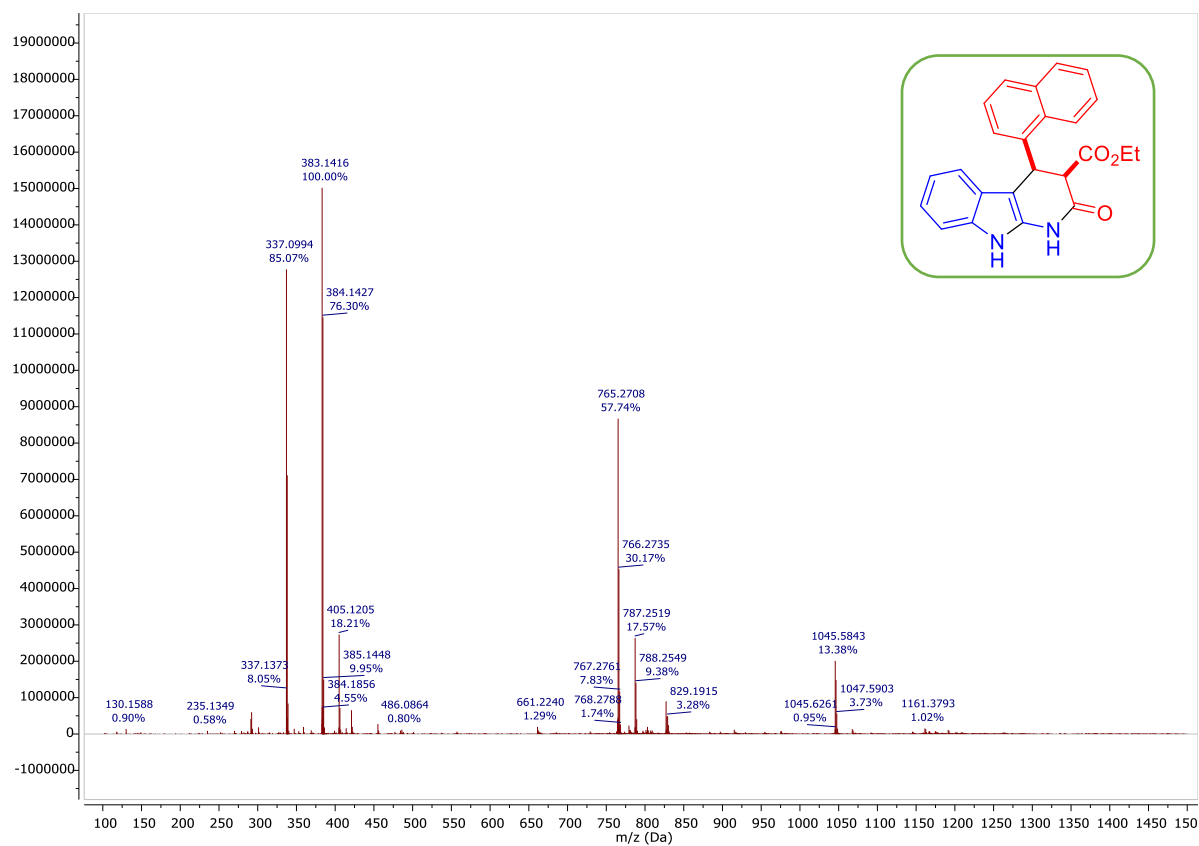

# HRMS spectrum of compound **8a**

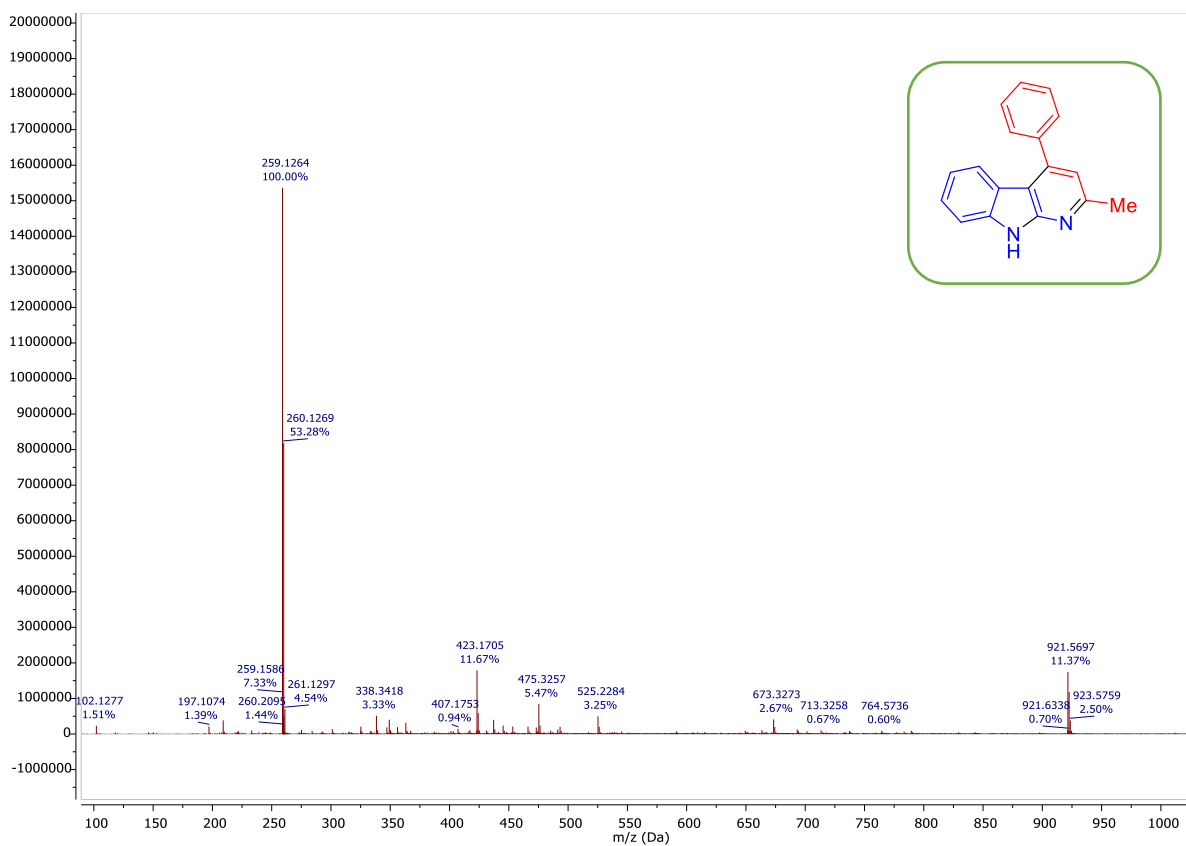

# HRMS spectrum of compound **8b**

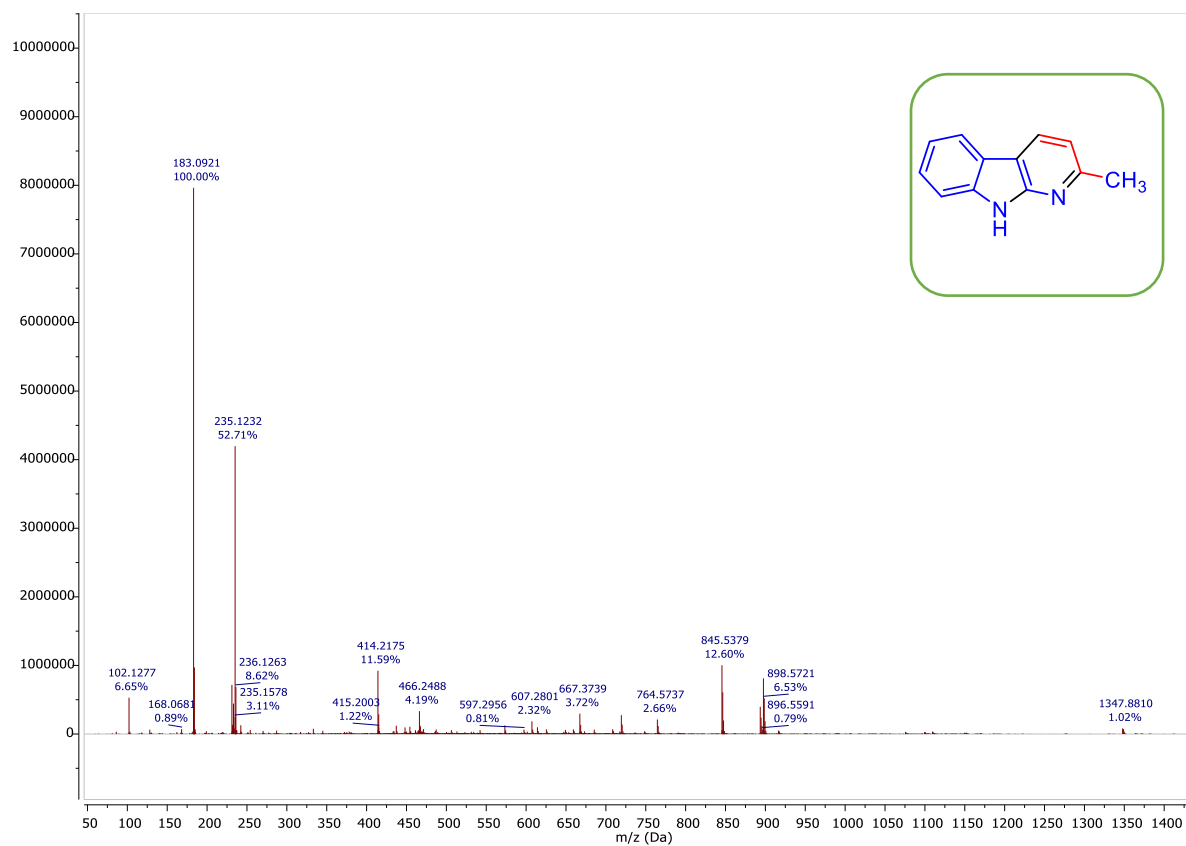

### HRMS spectrum of compound **8c**

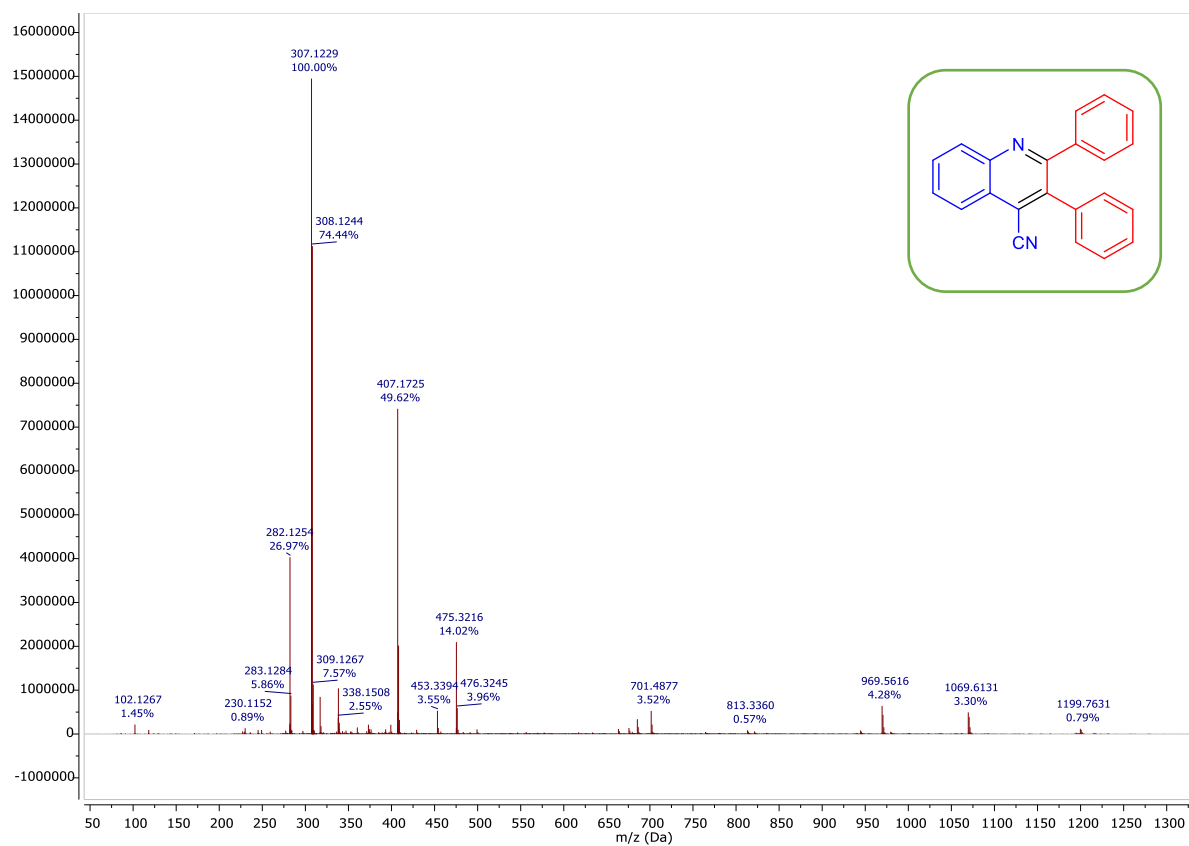

# HRMS spectrum of compound 10a

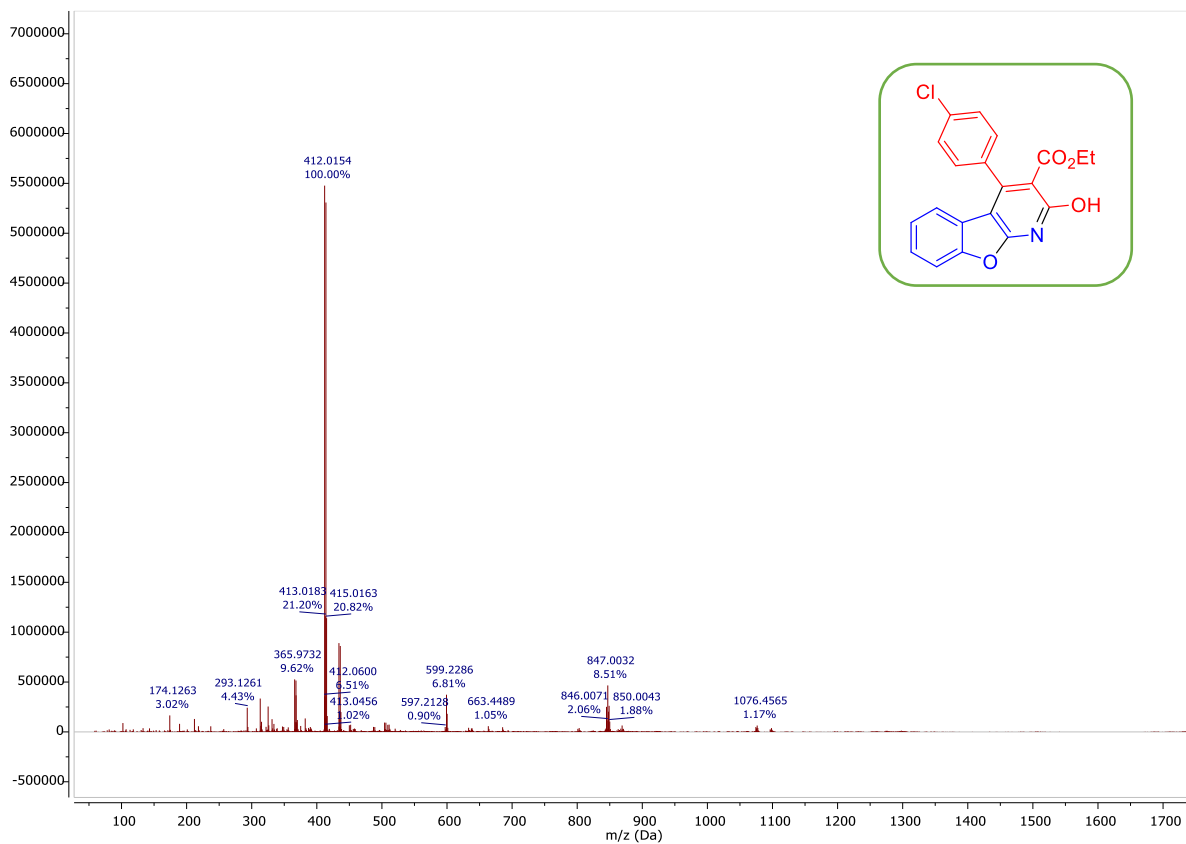

# HRMS spectrum of compound **10b**

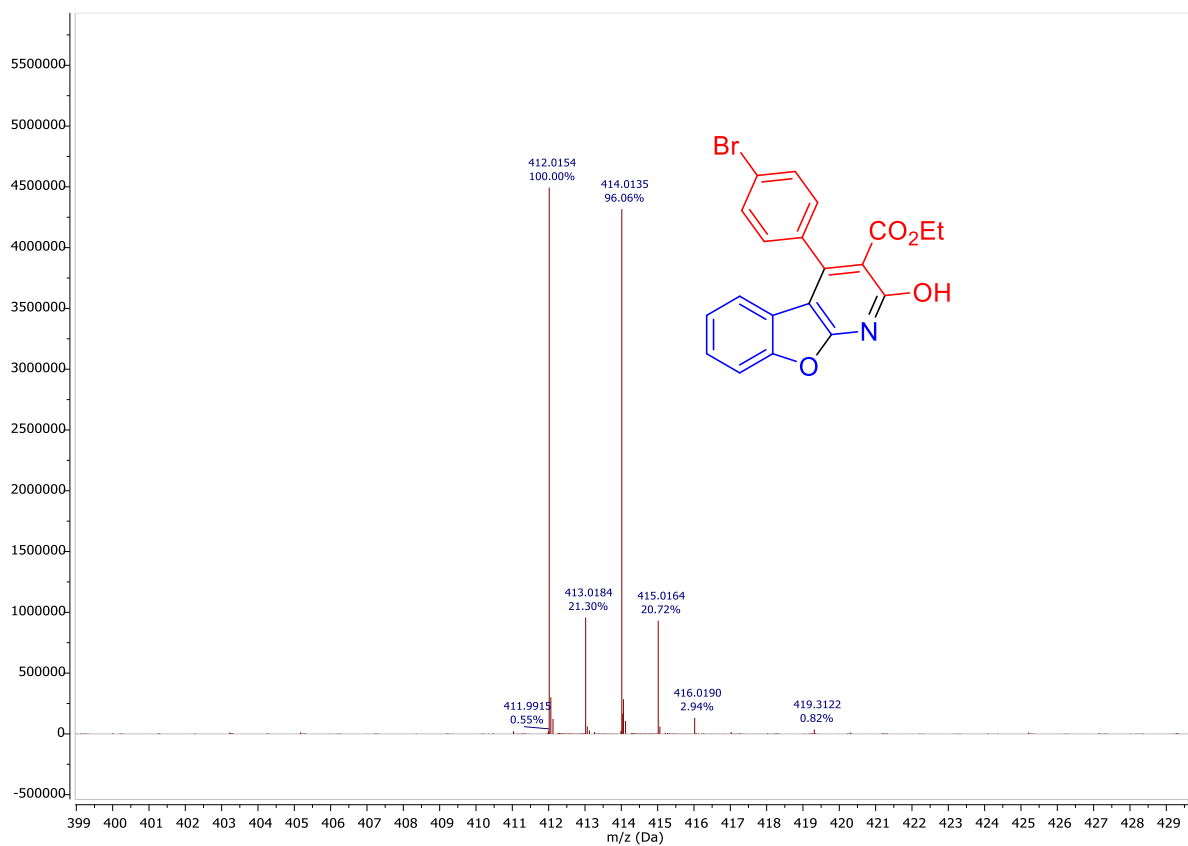

# HRMS spectrum of compound 10c

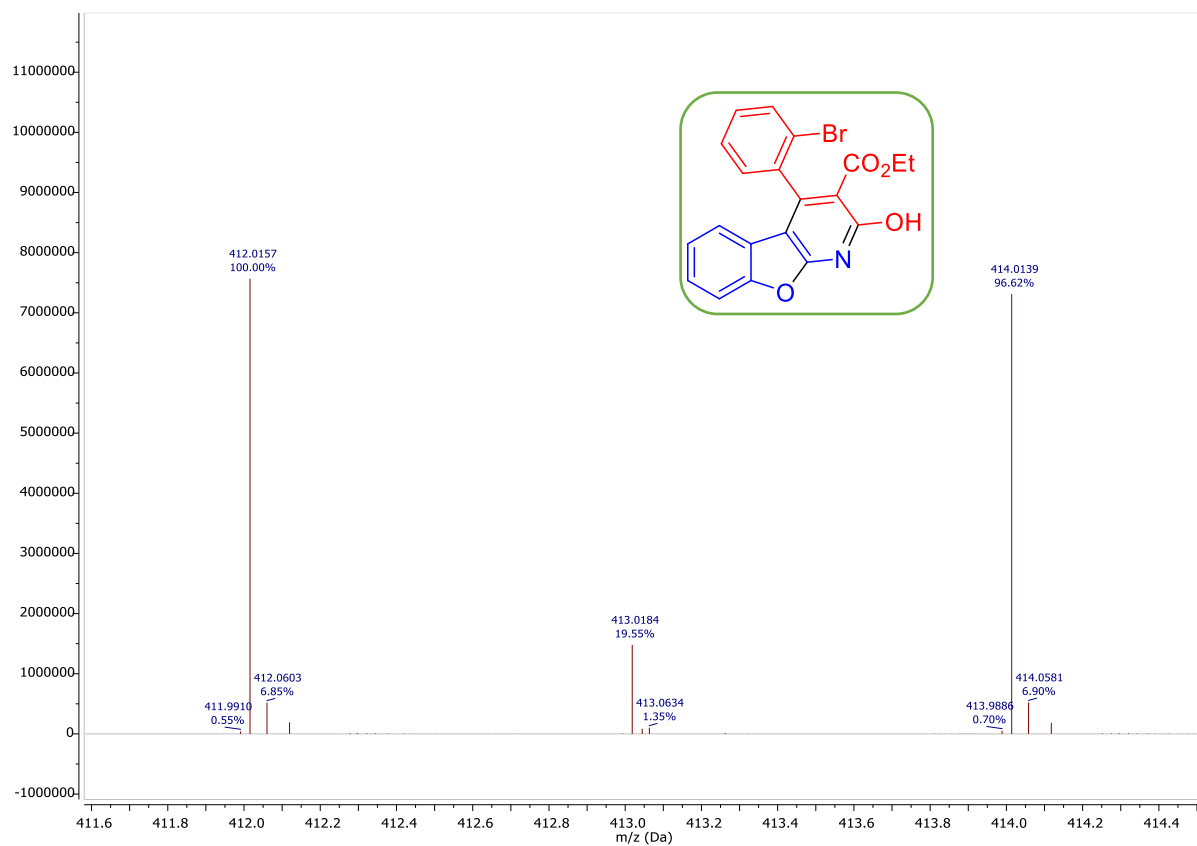

# HRMS spectrum of compound 10d

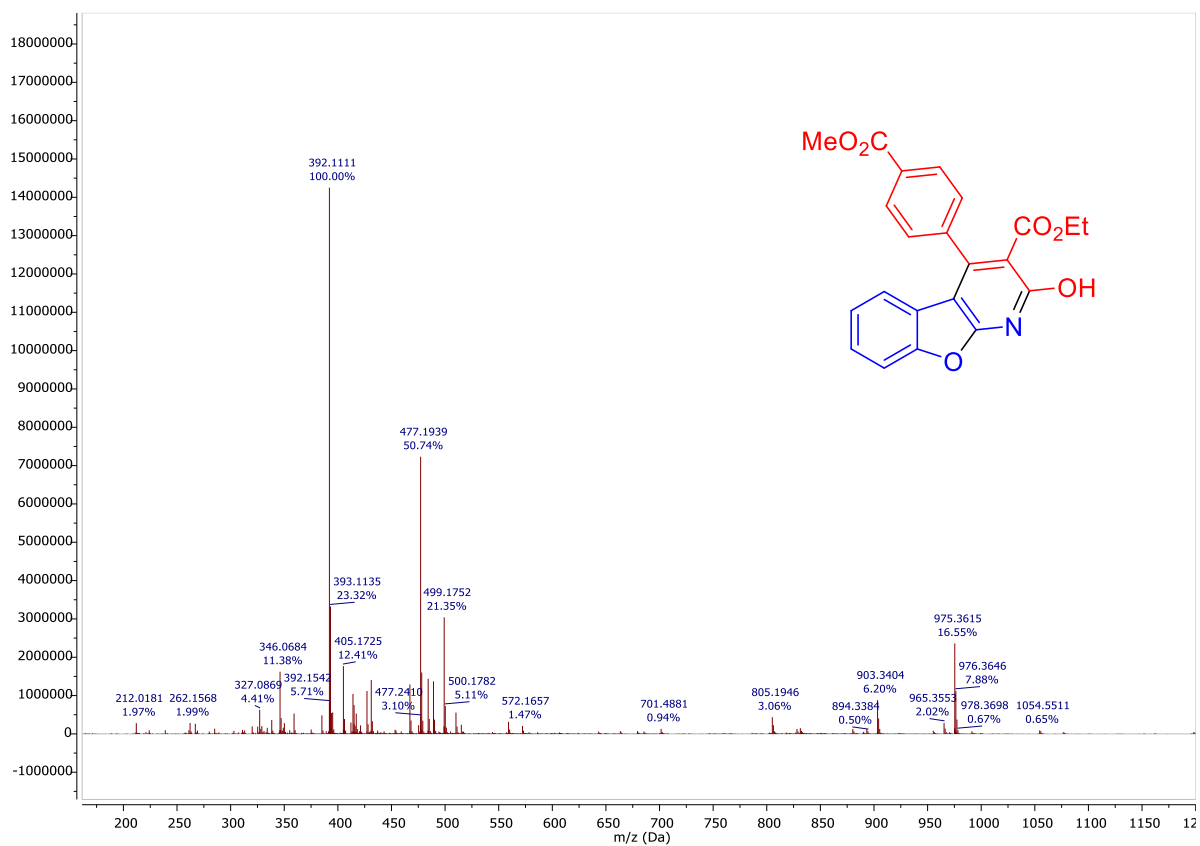

# HRMS spectrum of compound 10e

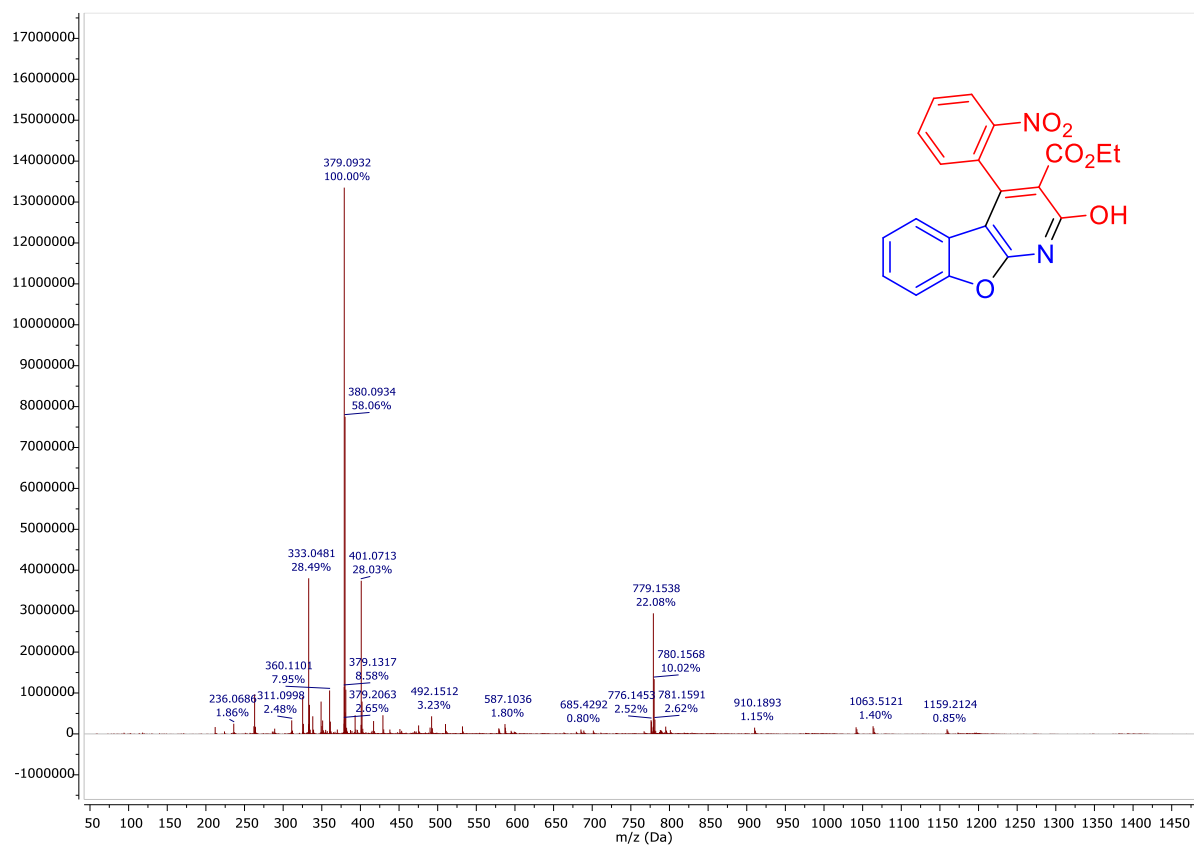

# HRMS spectrum of compound **10f**

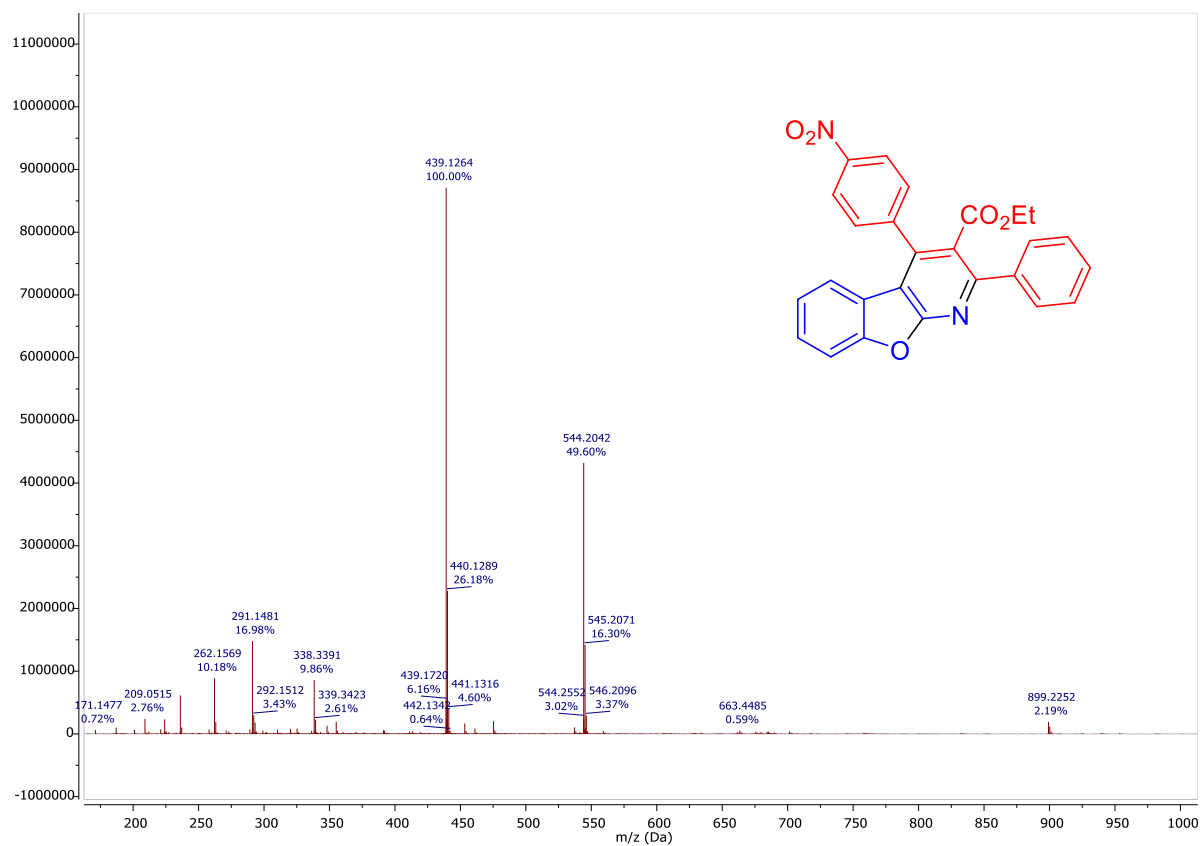

# HRMS spectrum of compound 10g

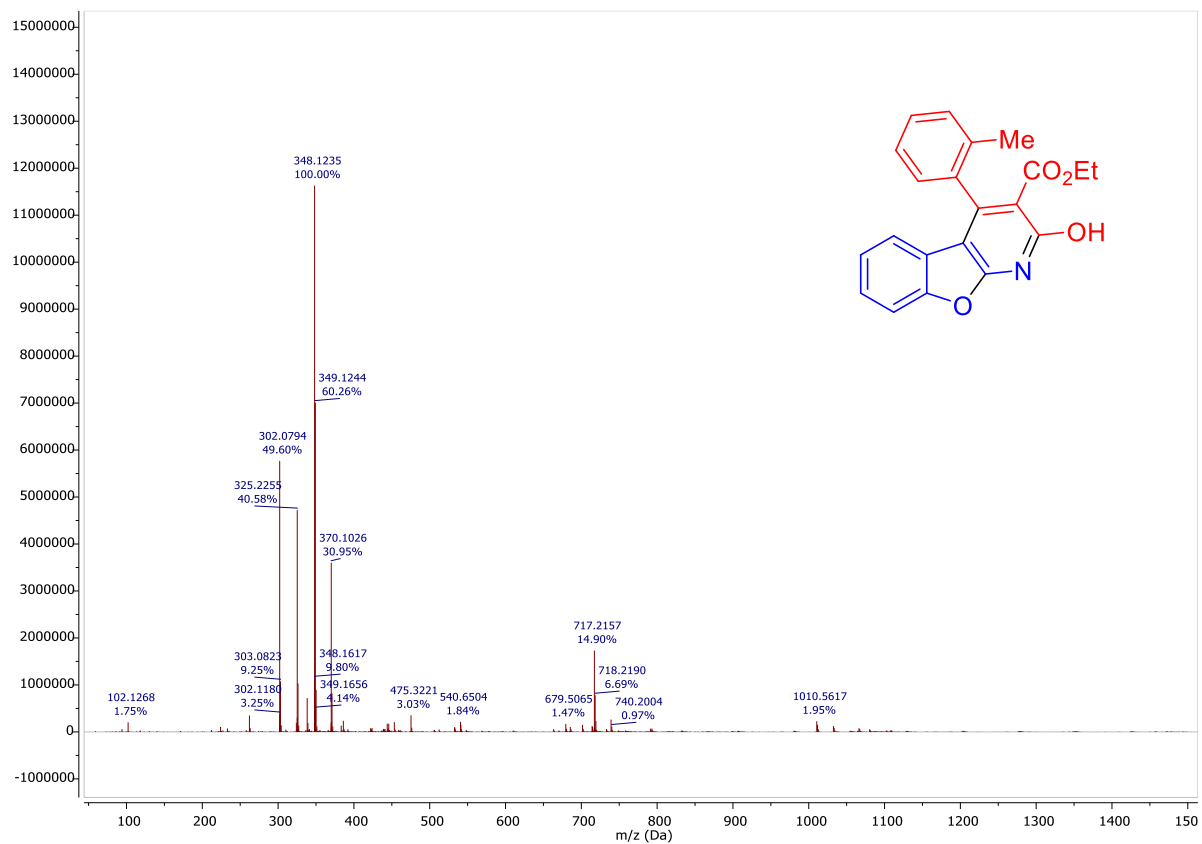

# HRMS spectrum of compound 10h

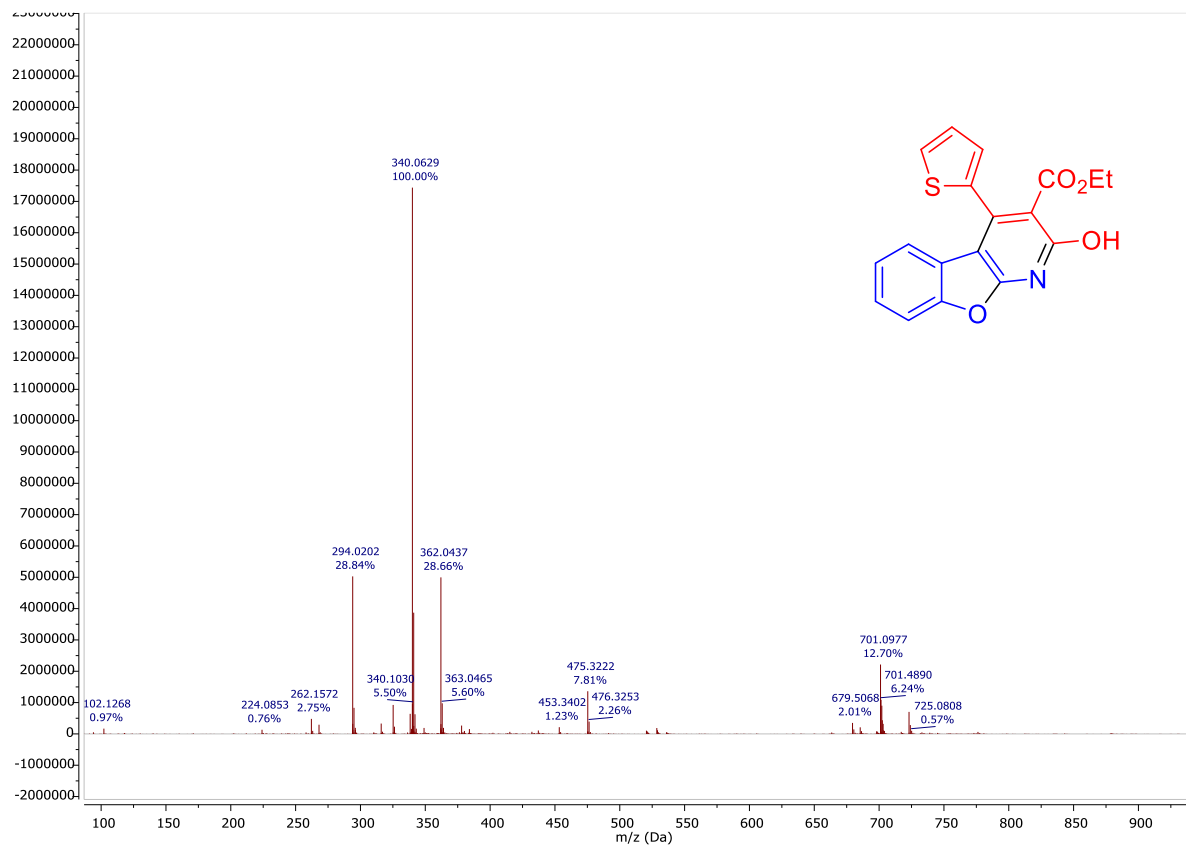

# HRMS spectrum of compound 11a

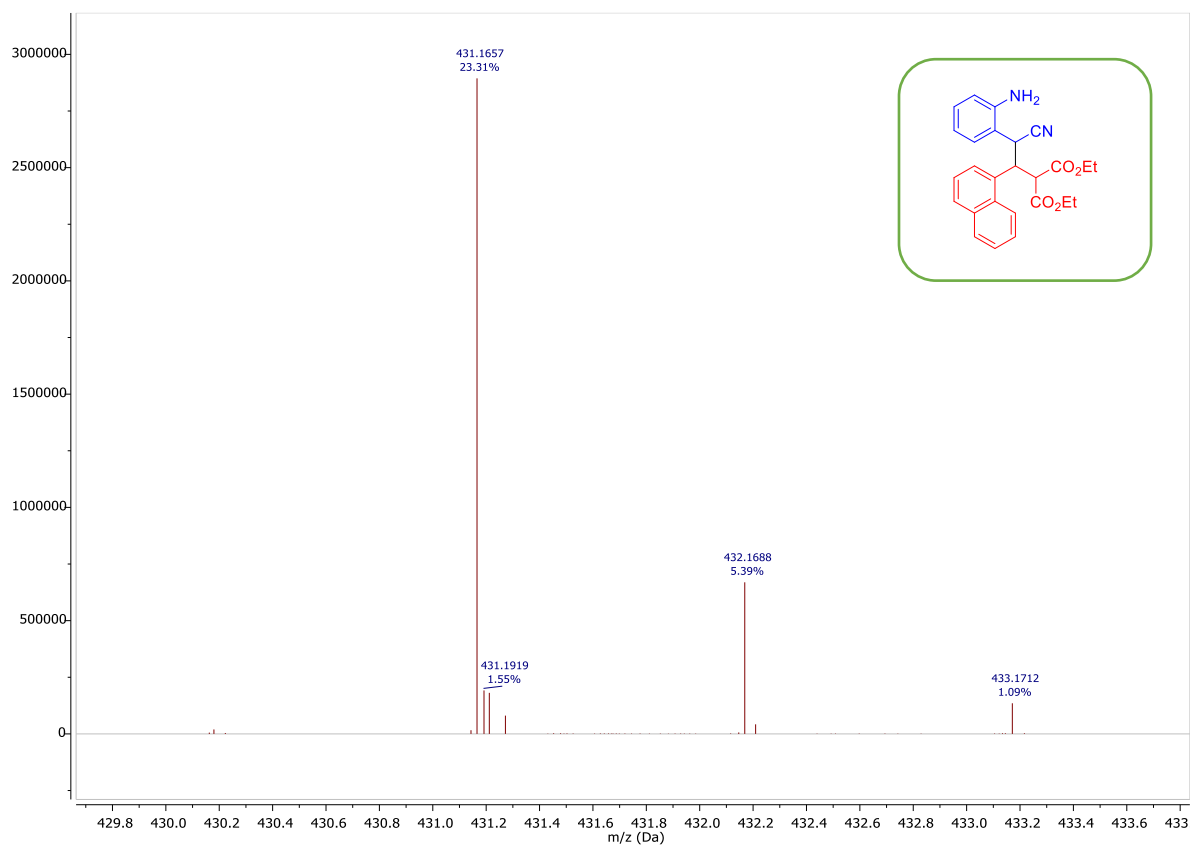

# HRMS spectrum of compound 12

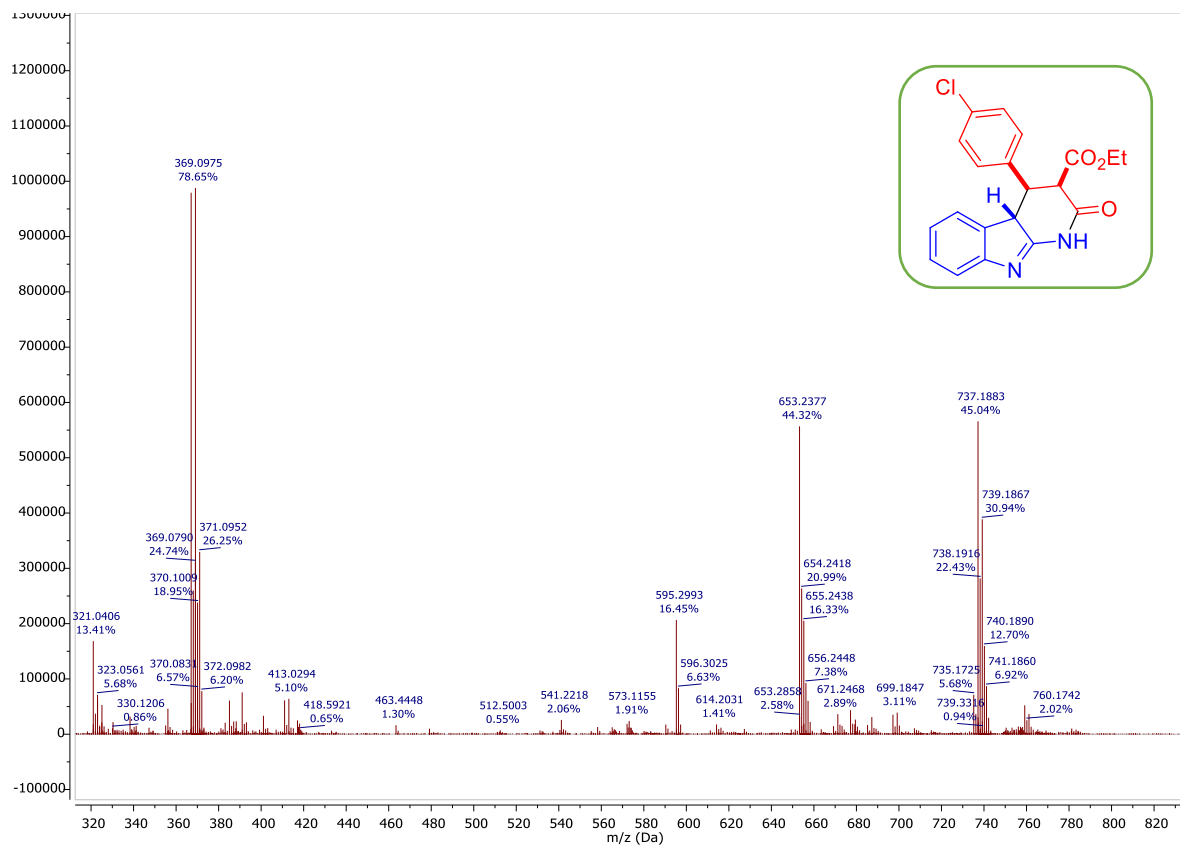

# HRMS spectrum of compound 13a

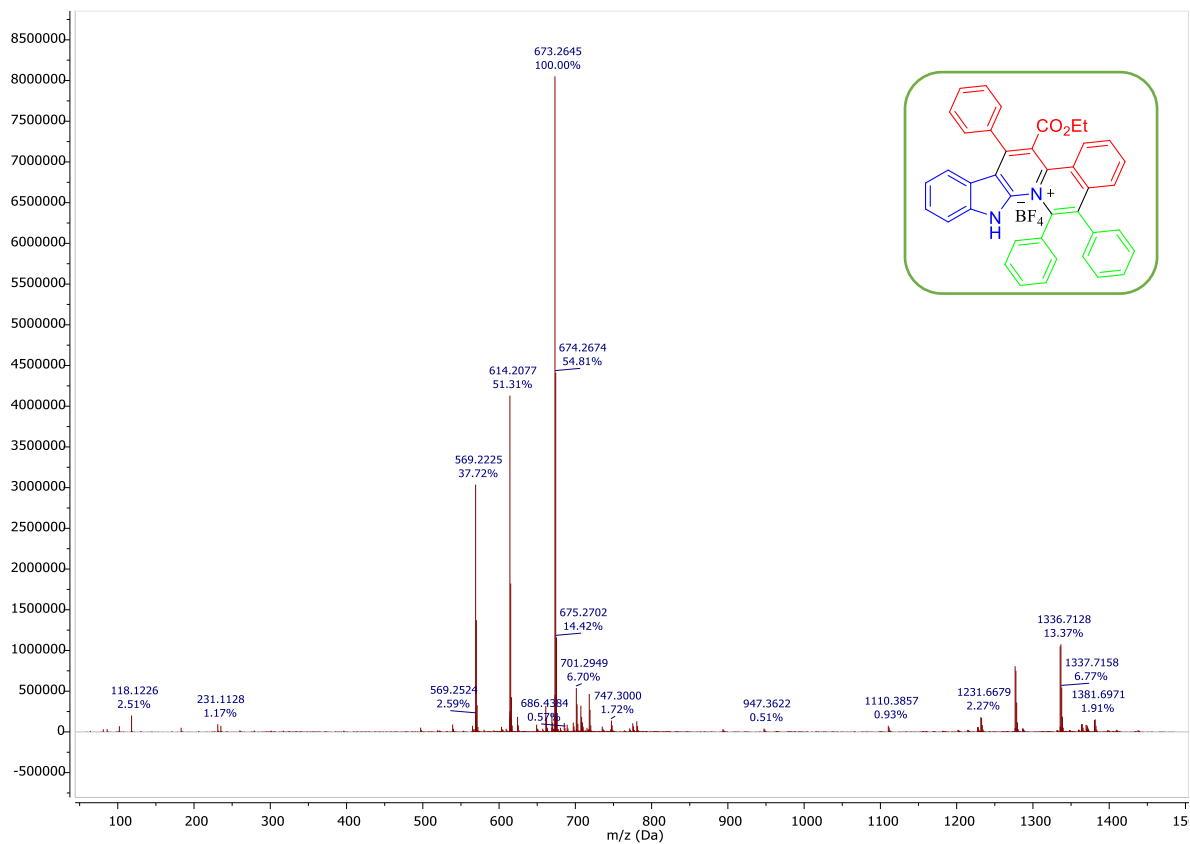

# HRMS spectrum of compound **13b**

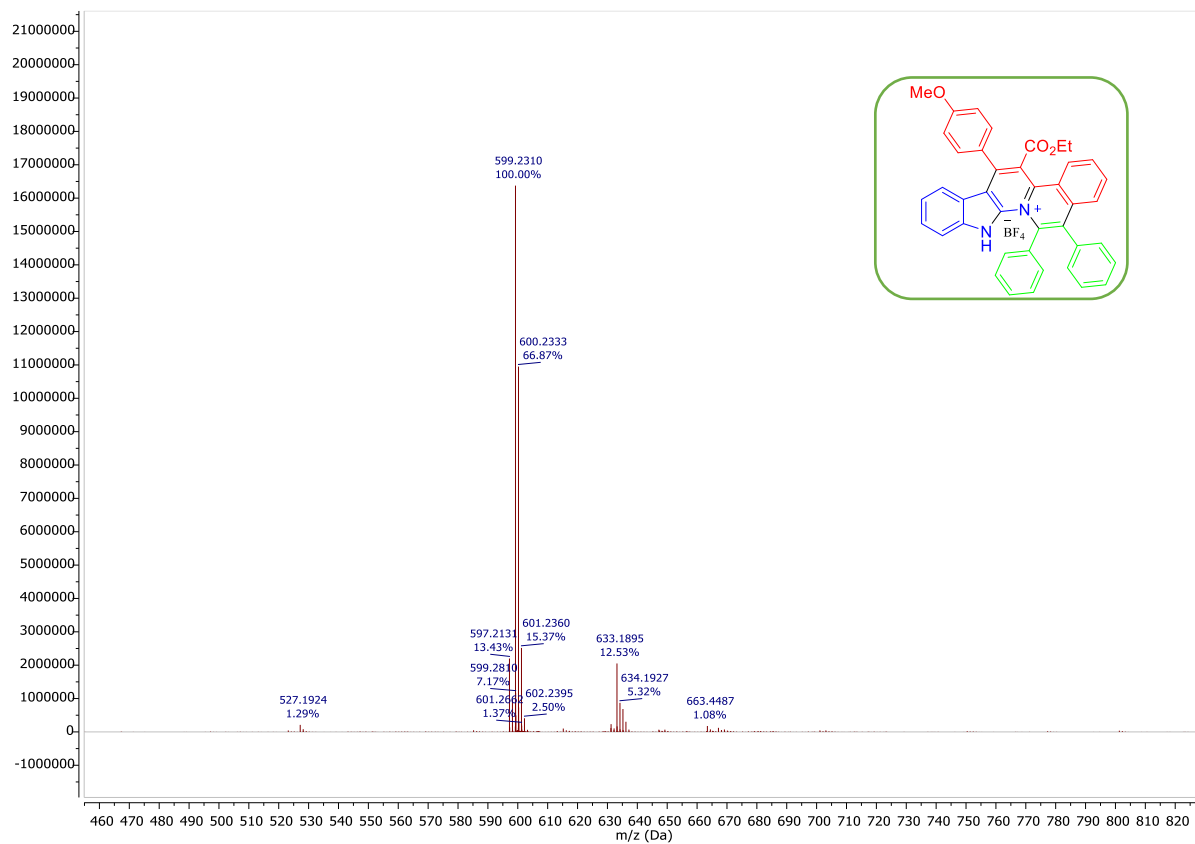

Supplement: d6ob00591h1.pdf [file d6ob00591h1.pdf]
